# Supplementary material for: Modulation of the NOTCH1 Pathway by LUNATIC FRINGE Is Dominant over That of MANIC or RADICAL FRINGE
Source: MDPI journal article supplement (doi:10.3390/molecules26195942), 2021-09-30
Supplement: s1 [file s1]

# **SUPPLEMENTARY MATERIALS**

**Modulation of the NOTCH1 pathway by LUNATIC FRINGE is dominant over that of MANIC or RADICAL FRINGE**

**Florian Pennarubia, Alison V. Nairn, Megumi Takeuchi, Kelley W. Moremen, Robert S Haltiwanger\***

Complex Carbohydrate Research Center, Department of Biochemistry and Molecular Biology, University of Georgia, Athens, GA 30602, USA.

\*Corresponding author: Robert S. Haltiwanger

**Contents:**

**Tables S1-S54**

**Figures S1-S7**

| Gene Name | Gene ID | Accession # | Forward Primer (5' to 3') | Reverse Primer (5' to 3') |
|-----------|---------|-------------|---------------------------|---------------------------|
| Pofut1    | 140484  | NM_080463   | CTCTCACCATGACCATGTGC      | CTGGCATTTCAGTGCTCTCAC     |
| Lfng      | 16848   | NM_008494   | TTCATCGCCGTCAAGACCACC     | CTCCTTGTGGCGCGAGATCC      |
| Mfng      | 17305   | NM_008595   | GCCCTCTTTACCCTCCTGTGC     | CGCGCCCTGTATCATCCTCTG     |
| Rfng      | 19719   | NM_009053   | GCCTGATGACTGCACTGTGGG     | CAGGTGCGAGTGGAACAGGG      |
| B4gal2    | 53418   | NM_017377   | GCCGCTATTCTCCACCCGAC      | GGTGCTCCCGGTGTCTAAAGG     |
| St3gal4   | 20443   | NM_009178   | GCTCCTGTGGCTGGCTACG       | GGGTCAAAGTGGGCCGACTC      |
| St6gal1   | 20440   | NM_145933   | TGCGTGTGGAAGAAAGGGAGC     | CTCCTGGCTCTTCGGCATCTG     |
| St6gal2   | 240119  | NM_172829   | AGCAATCCTGCGGCACCTATG     | CCGCTGCTTGCCCTGTAGAG      |

**Table S1: List of the mouse primers used for qRT-PCR analyses (NIH3T3).**

| Gene Name | Gene ID | Accession #  | Forward Primer (5' to 3') | Reverse Primer (5' to 3') |
|-----------|---------|--------------|---------------------------|---------------------------|
| POFUT1    | 23509   | NM_015352    | CCCCCTCAGGATGACTATGT      | GACCTCACCCAGAGCTTCAC      |
| LFNG      | 3955    | NM_001040167 | CGTCTACGTCGGCAAGC         | CACCTTGTTCTCGCTGACC       |
| MFNG      | 4242    | NM_002405    | GGCTGGTACAGTTCTGGTTTG     | TCAAAGCCAGTTTGCGATT       |
| RFNG      | 5986    | NM_002917    | ACAGTTGGCTACATCGTGGA      | CTCCAGGTGAGAGTGGAAGAG     |
| B4GALT2   | 8704    | NM_003780    | CAAGGCTGTGCTCCTTCTCT      | CTGGGCGTAGACGTCAAAGT      |
| ST3GAL4   | 6484    | NM_006278    | CGTCCTGGTAGCTTTCAAGG      | GCACCCGCTTCTTATCACTC      |
| ST6GAL1   | 6480    | NM_003032    | TATCTGCCCAAGGAGAGCAT      | GACGACACAACAGCACACCT      |
| ST6GAL2   | 84620   | NM_032528    | CTGTACCGGCTCTGGAAGG       | ATCCTTCATCGCCTTCTGC       |

**Table S2: List of the human primers used for qRT-PCR analyses (U2OS).**

**Table S3: List of searched peptides and glycoforms used for EICs generation and quantification**

**Table S4: Trypsin digestion of mN1 EGF1-18 + EV expressed in CHO analyzed for Figure 3, 6, S1, S3 and S6.**

**Table S5: V8 digestion of mN1 EGF1-18 + EV expressed in CHO analyzed for Figure 3, 6, S1, S3 and S6.**

**Table S6: Chymotrypsin digestion of mN1 EGF1-18 + EV expressed in CHO analyzed for Figure 3, 6, S1, S3 and S6.**

**Table S7: Trypsin digestion of mN1 EGF1-18 + LFNG expressed in CHO analyzed for Figure 3, 6, S2 ,S3 and S6.**

**Table S8: V8 digestion of mN1 EGF1-18 + LFNG expressed in CHO analyzed for Figure 3, 6, S2 ,S3 and S6.**

**Table S9: Chymotrypsin digestion of mN1 EGF1-18 + LFNG expressed in CHO analyzed for Figure 3, 6, S2 ,S3 and S6.**

**Table S10: Trypsin digestion of mN1 EGF1-18 + MFNG expressed in CHO analyzed for Figure 3, 6, S2 ,S3 and S6.**

**Table S11: V8 digestion of mN1 EGF1-18 + MFNG expressed in CHO analyzed for Figure 3, 6, S2 ,S3 and S6.**

**Table S12: Chymotrypsin digestion of mN1 EGF1-18 + MFNG expressed in CHO analyzed for Figure 3, 6, S2 ,S3 and S6.**

**Table S13: Trypsin digestion of mN1 EGF1-18 + RFNG expressed in CHO analyzed for Figure 3, 6, S2 ,S3 and S6.**

**Table S14: V8 digestion of mN1 EGF1-18 + RFNG expressed in CHO analyzed for Figure 3, 6, S2 ,S3 and S6.**

**Table S15: Chymotrypsin digestion of mN1 EGF1-18 + RFNG expressed in CHO analyzed for Figure 3, 6, S2 ,S3 and S6.**

**Table S16: Trypsin digestion of mN1 EGF1-18 + LFNG + MFNG expressed in CHO analyzed for Figure 6, S3 and S6.**

**Table S17: V8 digestion of mN1 EGF1-18 + LFNG + MFNG expressed in CHO analyzed for Figure 6, S3 and S6.**

**Table S18: Chymotrypsin digestion of mN1 EGF1-18 + LFNG + MFNG expressed in CHO analyzed for Figure 6, S3 and S6.**

**Table S19: Trypsin digestion of mN1 EGF1-18 + LFNG + RFNG expressed in CHO analyzed for Figure 6, S3 and S6.**

**Table S20: V8 digestion of mN1 EGF1-18 + LFNG + RFNG expressed in CHO analyzed for Figure 6, S3 and S6.**

**Table S21: Chymotrypsin digestion of mN1 EGF1-18 + LFNG + RFNG expressed in CHO analyzed for Figure 6, S3 and S6.**

**Table S22: Trypsin digestion of mN1 EGF1-18 + MFNG + RFNG expressed in CHO analyzed for Figure 6, S3 and S6.**

**Table S23: V8 digestion of mN1 EGF1-18 + MFNG + RFNG expressed in CHO analyzed for Figure 6, S3 and S6.**

**Table S24: Chymotrypsin digestion of mN1 EGF1-18 + MFNG + RFNG expressed in CHO analyzed for Figure 6, S3 and S6.**

**Table S25: Trypsin digestion of mN1 EGF1-18 + LFNG + MFNG + RFNG expressed in CHO analyzed for Figure 6, S3 and S6.**

**Table S26: V8 digestion of mN1 EGF1-18 + LFNG + MFNG + RFNG expressed in CHO analyzed for Figure 6, S3 and S6.**

**Table S27: Chymotrypsin digestion of mN1 EGF1-18 + LFNG + MFNG + RFNG expressed in CHO analyzed for Figure 6, S3 and S6.**

**Table S28: Trypsin digestion of mN1 EGF1-18 + EV expressed in U2OS analyzed for Figure 3, 7, S1, S3 and S6.**

- Table S29: V8 digestion of mN1 EGF1-18 + EV expressed in U2OS analyzed for Figure 3, 7, S1, S3 and S6.
- Table S30: Chymotrypsin digestion of mN1 EGF1-18 + EV expressed in U2OS analyzed for Figure 3, 7, S1, S3 and S6.
- Table S31: Trypsin digestion of mN1 EGF1-18 + LFNG expressed in U2OS analyzed for Figure 3, 7, S2 ,S3 and S6.
- Table S32: V8 digestion of mN1 EGF1-18 + LFNG expressed in U2OS analyzed for Figure 3, 7, S2 ,S3 and S6.
- Table S33: Chymotrypsin digestion of mN1 EGF1-18 + LFNG expressed in U2OS analyzed for Figure 3, 7, S2 ,S3 and S6.
- Table S34: Trypsin digestion of mN1 EGF1-18 + MFNG expressed in U2OS analyzed for Figure 3, 7, S2 ,S3 and S6.
- Table S35: V8 digestion of mN1 EGF1-18 + MFNG expressed in U2OS analyzed for Figure 3, 7, S2 ,S3 and S6.
- Table S36: Chymotrypsin digestion of mN1 EGF1-18 + MFNG expressed in U2OS analyzed for Figure 3, 7, S2 ,S3 and S6.
- Table S37: Trypsin digestion of mN1 EGF1-18 + RFNG expressed in U2OS analyzed for Figure 3, 7, S2 ,S3 and S6.
- Table S38: V8 digestion of mN1 EGF1-18 + RFNG expressed in U2OS analyzed for Figure 3, 7, S2 ,S3 and S6.
- Table S39: Chymotrypsin digestion of mN1 EGF1-18 + RFNG expressed in U2OS analyzed for Figure 3, 7, S2 ,S3 and S6.
- Table S40: Trypsin digestion of mN1 EGF1-18 + LFNG + MFNG expressed in U2OS analyzed for Figure 7, S3 and S6.
- Table S41: V8 digestion of mN1 EGF1-18 + LFNG + MFNG expressed in U2OS analyzed for Figure 7, S3 and S6.
- Table S42: Chymotrypsin digestion of mN1 EGF1-18 + LFNG + MFNG expressed in U2OS analyzed for Figure 7, S3 and S6.
- Table S43: Trypsin digestion of mN1 EGF1-18 + LFNG + RFNG expressed in U2OS analyzed for Figure 7, S3 and S6.
- Table S44: V8 digestion of mN1 EGF1-18 + LFNG + RFNG expressed in U2OS analyzed for Figure 7, S3 and S6.
- Table S45: Chymotrypsin digestion of mN1 EGF1-18 + LFNG + RFNG expressed in U2OS analyzed for Figure 7, S3 and S6.
- Table S46: Trypsin digestion of mN1 EGF1-18 + MFNG + RFNG expressed in U2OS analyzed for Figure 7, S3 and S6.
- Table S47: V8 digestion of mN1 EGF1-18 + MFNG + RFNG expressed in U2OS analyzed for Figure 7, S3 and S6.
- Table S48: Chymotrypsin digestion of mN1 EGF1-18 + MFNG + RFNG expressed in U2OS analyzed for Figure 7, S3 and S6.
- Table S49: Trypsin digestion of mN1 EGF1-18 + LFNG + MFNG + RFNG expressed in U2OS analyzed for Figure 7, S3 and S6.
- Table S50: V8 digestion of mN1 EGF1-18 + LFNG + MFNG + RFNG expressed in U2OS analyzed for 7, S3 and S6.
- Table S51: Chymotrypsin digestion of mN1 EGF1-18 + LFNG + MFNG + RFNG expressed in U2OS analyzed for Figure 7, S3 and S6.
- Table S52: V8 digestion of mN1 EGF1-18 + EV expressed in NIH3T3 analyzed for Figure S1.
- Table S53: Chymotrypsin digestion of mN1 EGF1-18 + EV expressed in NIH3T3 analyzed for Figure S1.
- Table S54: Description of the files uploaded to the PRIDE repository.

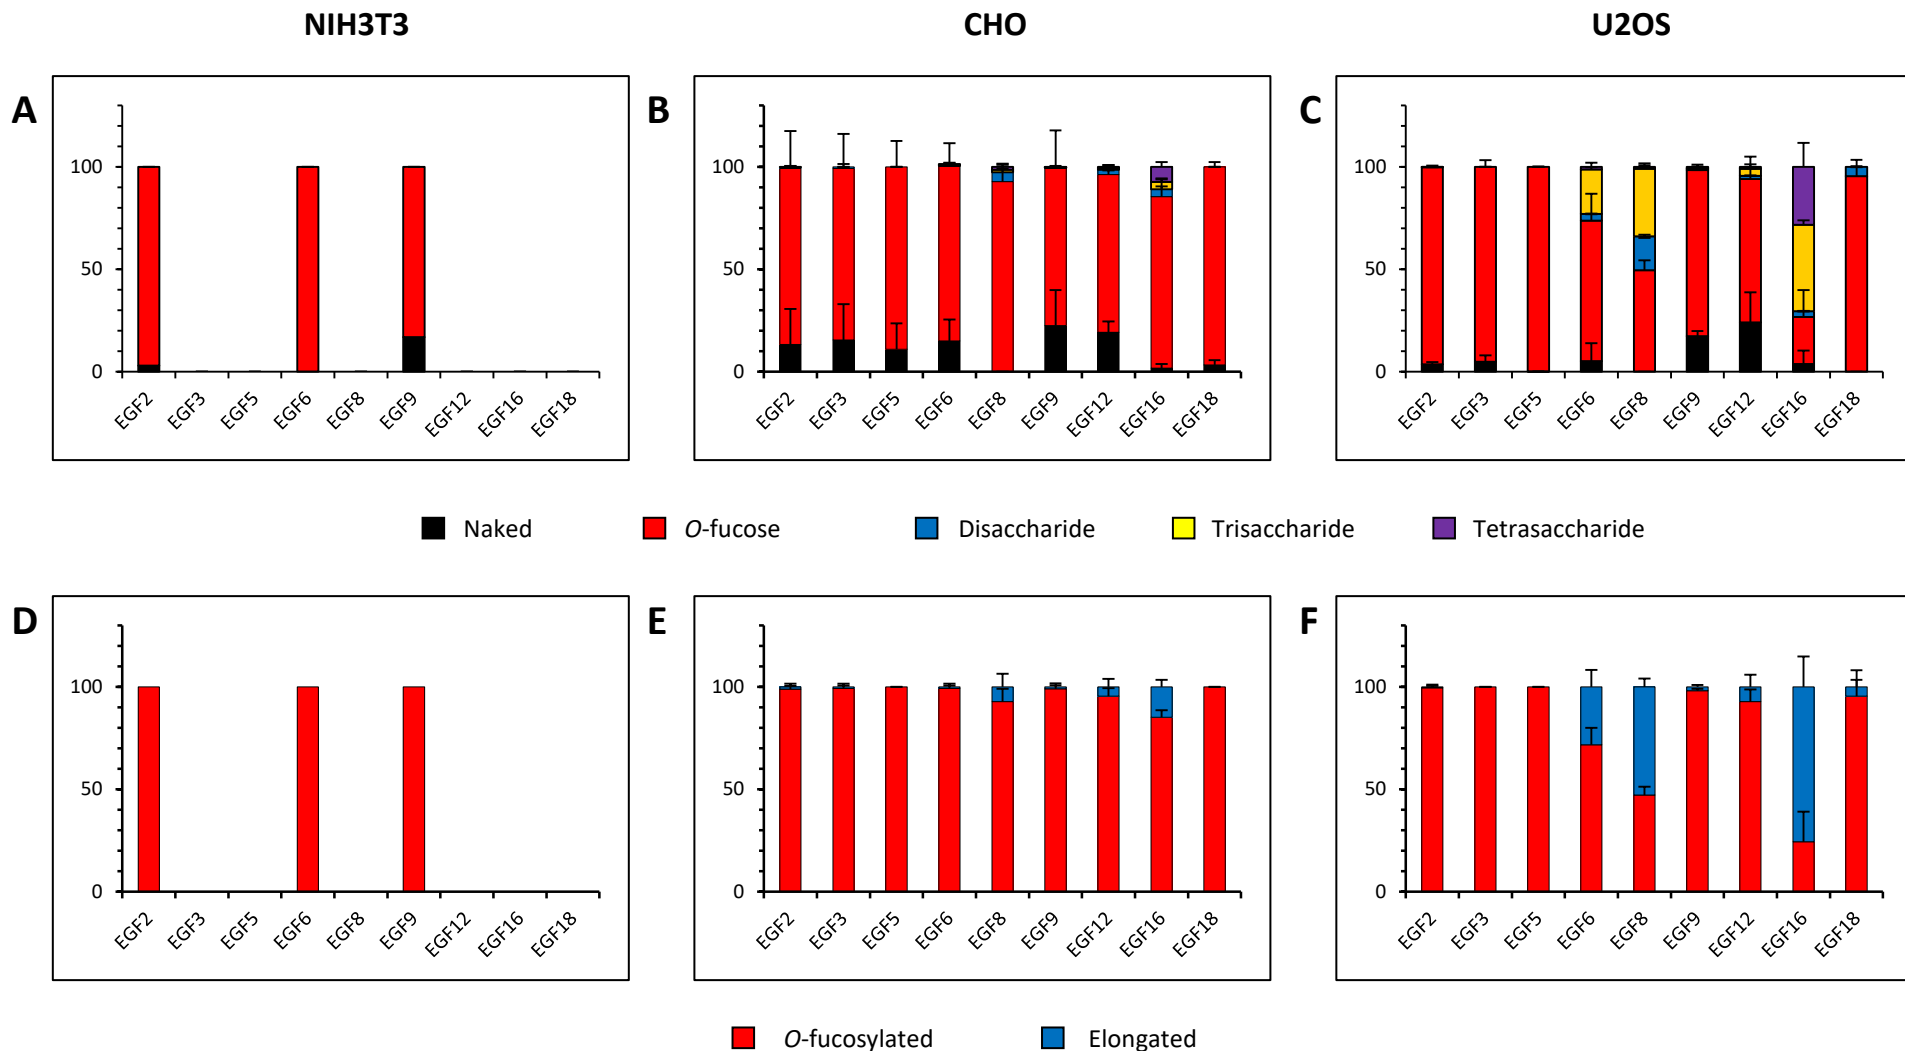

**Figure S1: *O*-fucose glycoforms of N1 receptor in the absence of exogenous Fringe.** (A-C) Quantification of the percentage of naked peptide (black), peptides modified by a monosaccharide (red), disaccharide (blue), trisaccharide (yellow), tetrasaccharide (purple) *O*-fucose (D-F) Quantification of the percentage of peptides modified by a monosaccharide *O*-fucose (red) and elongated *O*-fucose (blue) by at least a GlcNAc. The Extracted Ion Chromatogram (EIC) of the Mass Spectrometry (MS) data of peptides derived from mouse N1 EGF1-18 overexpressed in (A, C) NIH3T3, (B, D) CHO and (C-F) U2OS were used for the quantification. Bar graph shows mean  $\pm$  SD ; three or four independent experiments (depending on the cell line)  $n = 3$  to 4 were analyzed. The data used to generate the EICs are available in the Table S4 to S6 (CHO), S28 to 30 (U2OS), S52 and S53 (NIH3T3). The ions used to generate the EICs are in Table S3.

**+ LFNG**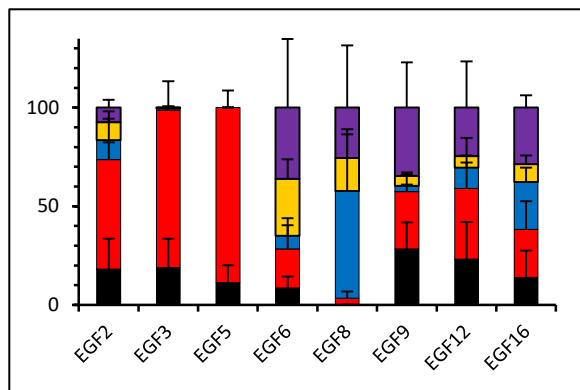**+ MFNG**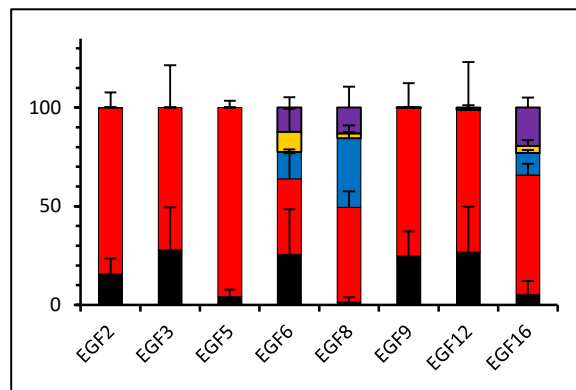**+ RFNG**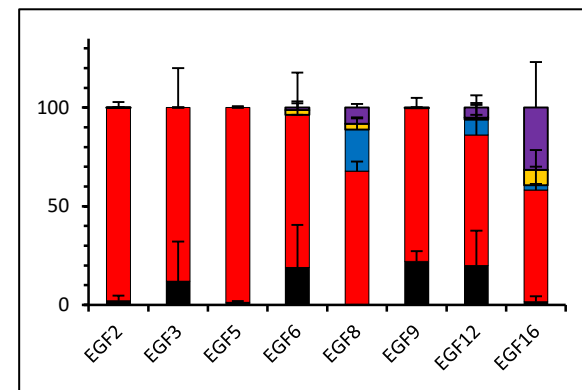**CHO**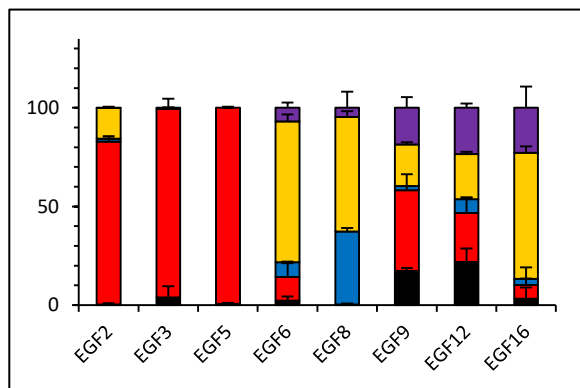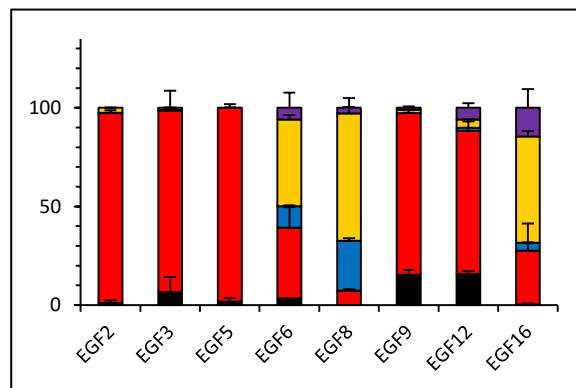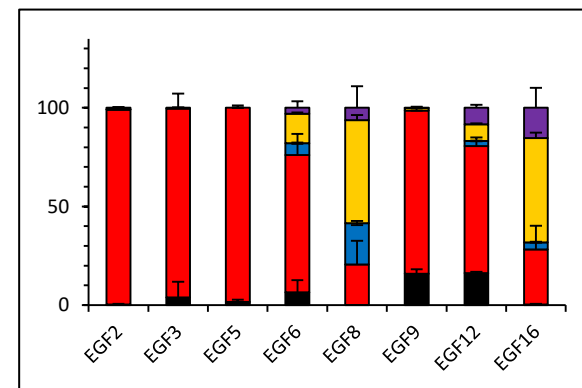**U2OS**

Naked
  *O*-fucose
  Disaccharide
  Trisaccharide
  Tetrasaccharide

**Figure S2: *O*-fucose glycoforms of N1 receptor in presence of Fringe in CHO and U2OS cell lines.** Quantification of the percentage of naked peptide (black), peptides modified by a monosaccharide (red), disaccharide (blue), trisaccharide (yellow), tetrasaccharide (purple) *O*-fucose. The Extracted Ion Chromatogram (EIC) of the Mass Spectrometry (MS) data of peptides derived from mouse N1 EGF1-18 overexpressed in CHO (top) and U2OS (bottom) were used for the quantification. Bar graph shows mean  $\pm$  SD ; three or four independent experiments (depending on the cell line)  $n = 3$  to 4 were analyzed. The data used to generate the EICs are available in the Table S7 to S15 (CHO), S31 to S39 (U2OS). The ions used to generate the EICs are in Table S3.

## EGF 18

CAGSPCHNGGTCEDGIAGFTCRCP

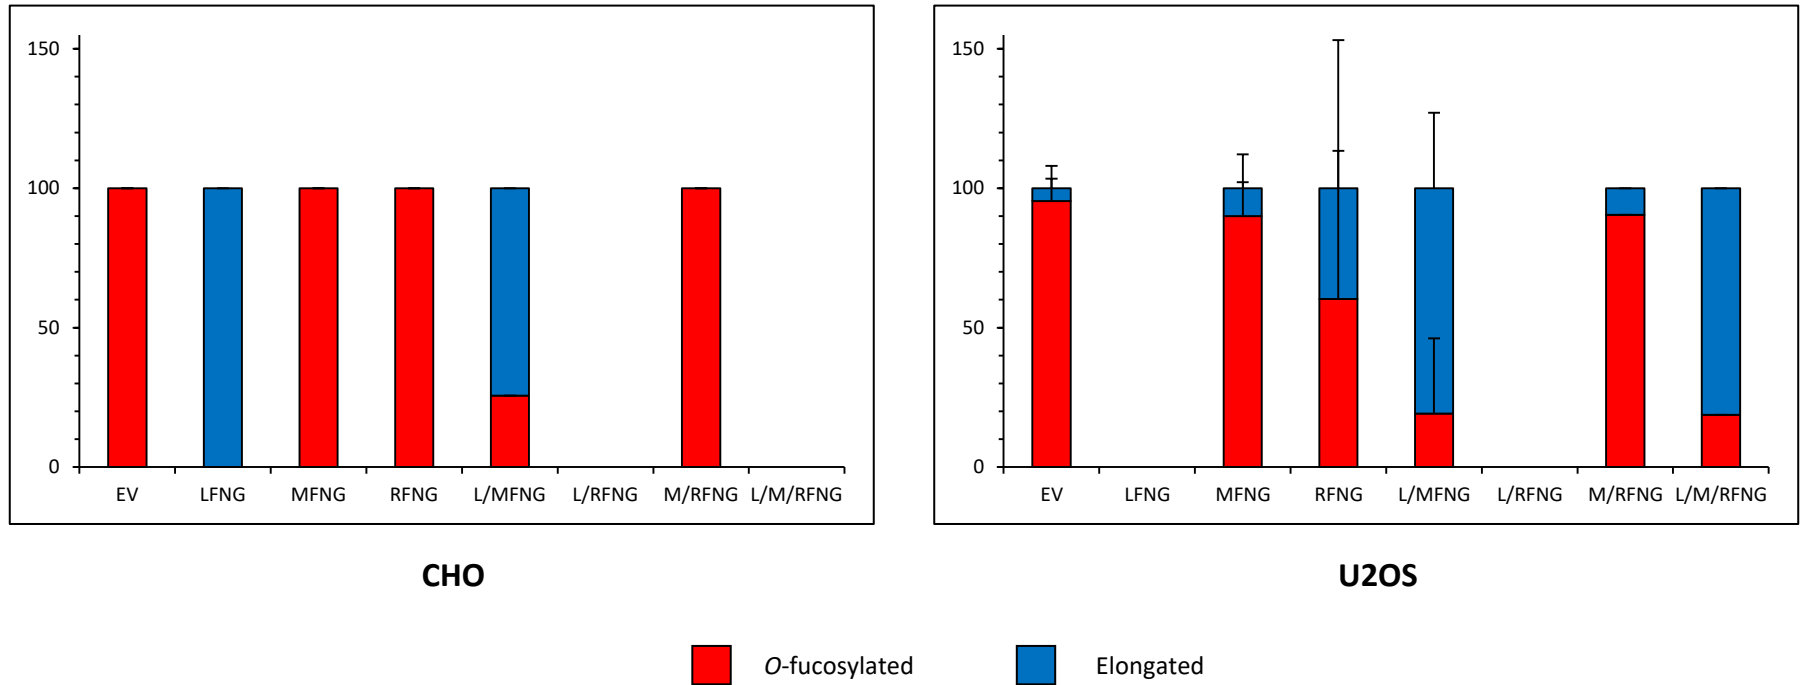

CHO

U2OS

■ O-fucosylated    ■ Elongated

**Figure S3: Elongation of N1 EGF18 in CHO and U2OS cell lines.** Quantification of the percentage of peptides modified by a monosaccharide *O*-fucose (red) and elongated *O*-fucose (blue) by at least a GlcNAc. The Extracted Ion Chromatogram (EIC) of the Mass Spectrometry (MS) data of peptides derived from mouse N1 EGF1-18 overexpressed in CHO (left) and U2OS (right) were used for the quantification. Bar graph shows mean  $\pm$  SD ; one to three independent experiments (depending on the cell line and the condition)  $n = 1$  to 3 were analyzed. The data used to generate the EICs are available in the Table S4 to S27 (CHO) and Table S28 to S51 (U2OS). The ions used to generate the EICs are in Table S3.



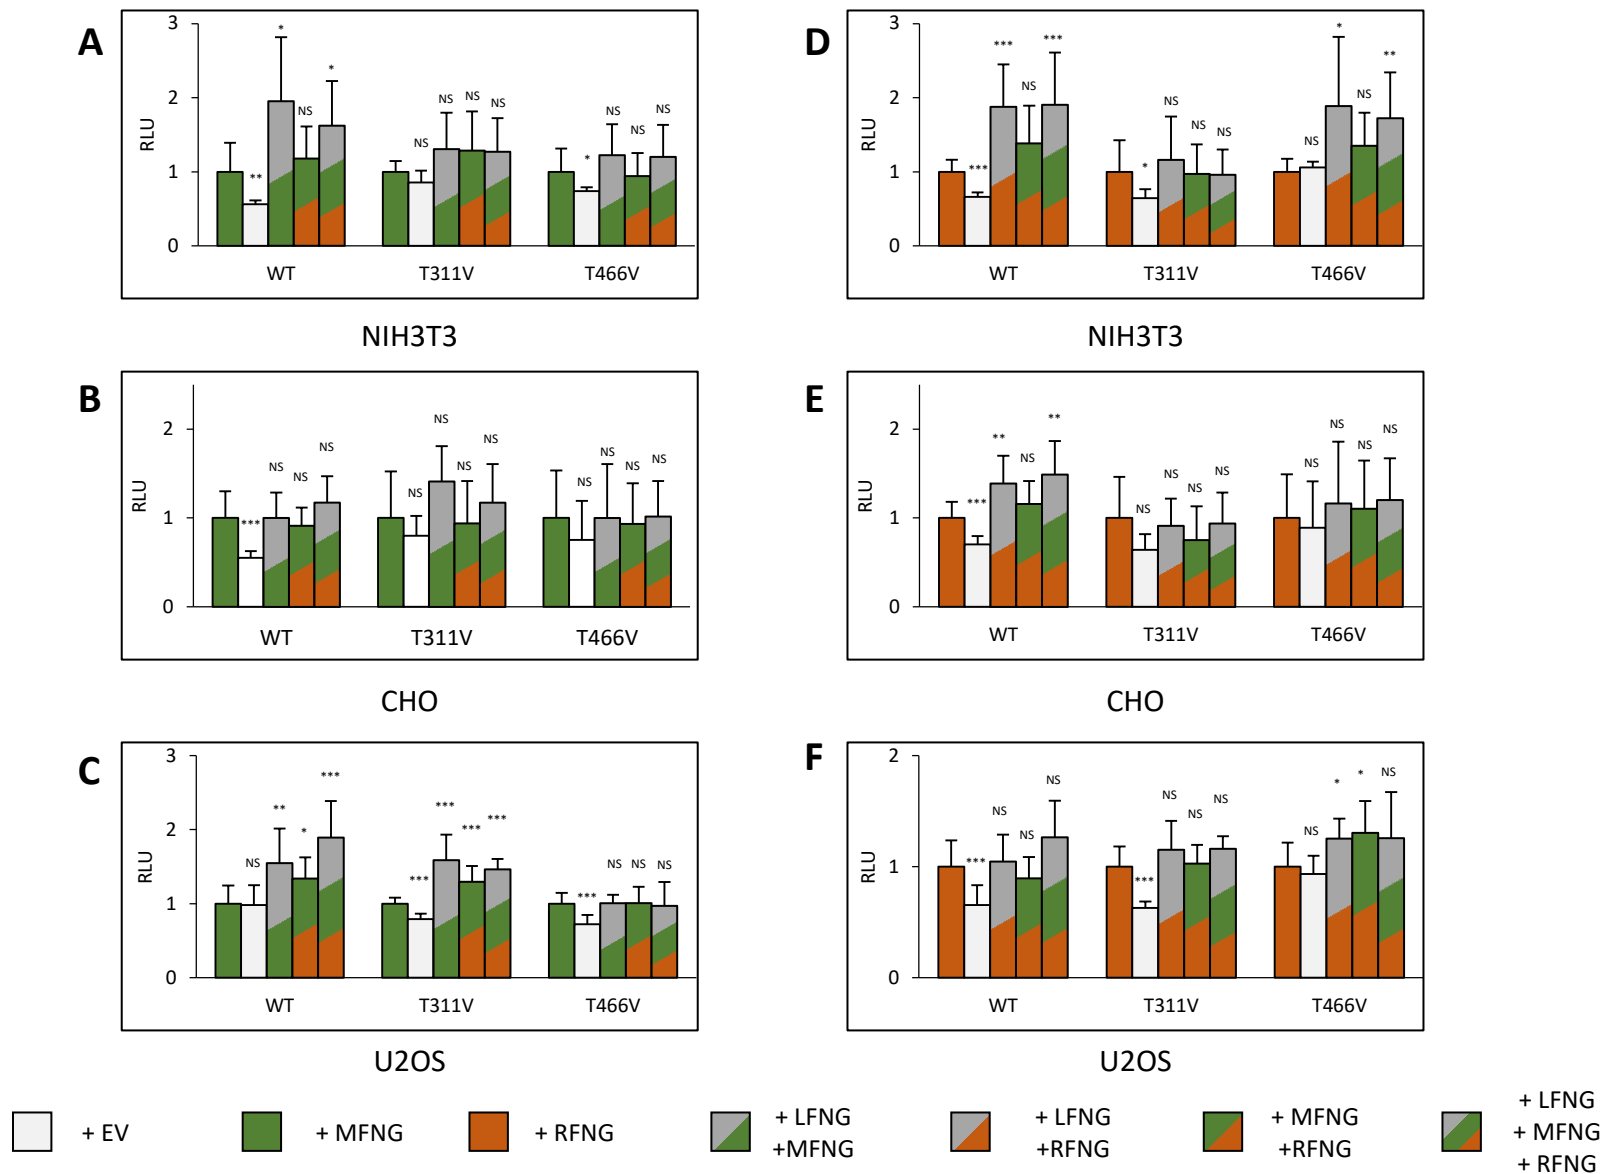

**Figure S4: Effect of the mutation of EGF8 or 12 O-fucosylation sites on Fringe dominance associated with N1 signaling induced by DLL1.** (A), (D) NIH3T3, (B), (E) CHO and (C), (F) U2OS were co-transfected with plasmids encoding full-length mouse wild-type (WT) N1 or mutated on EGF8 (T<sup>311</sup>V) or 12 (T<sup>466</sup>V) O-fucosylation site with empty vector (EV) or Lunatic Fringe (LFNG) and/or Manic Fringe (MFNG) and/or Radical Fringe (RFNG), then cell-based co-culture N1 activation assays was performed with L-cell stably overexpressed DLL1. Relative Luciferase units (RLU) compared (A-C) to MFNG or (D-F) to RFNG (normalized to 1 for each condition and cell line) were determined. Statistical significance was calculated using one-way ANOVA. Bar graph shows mean  $\pm$  SD; four or five independent experiments (depending on the cell line) n = 8 to 10 were analyzed (\*\*\*,  $p < 0.005$ ; \*\*,  $p < 0.01$ ; \*,  $p < 0.05$ ).

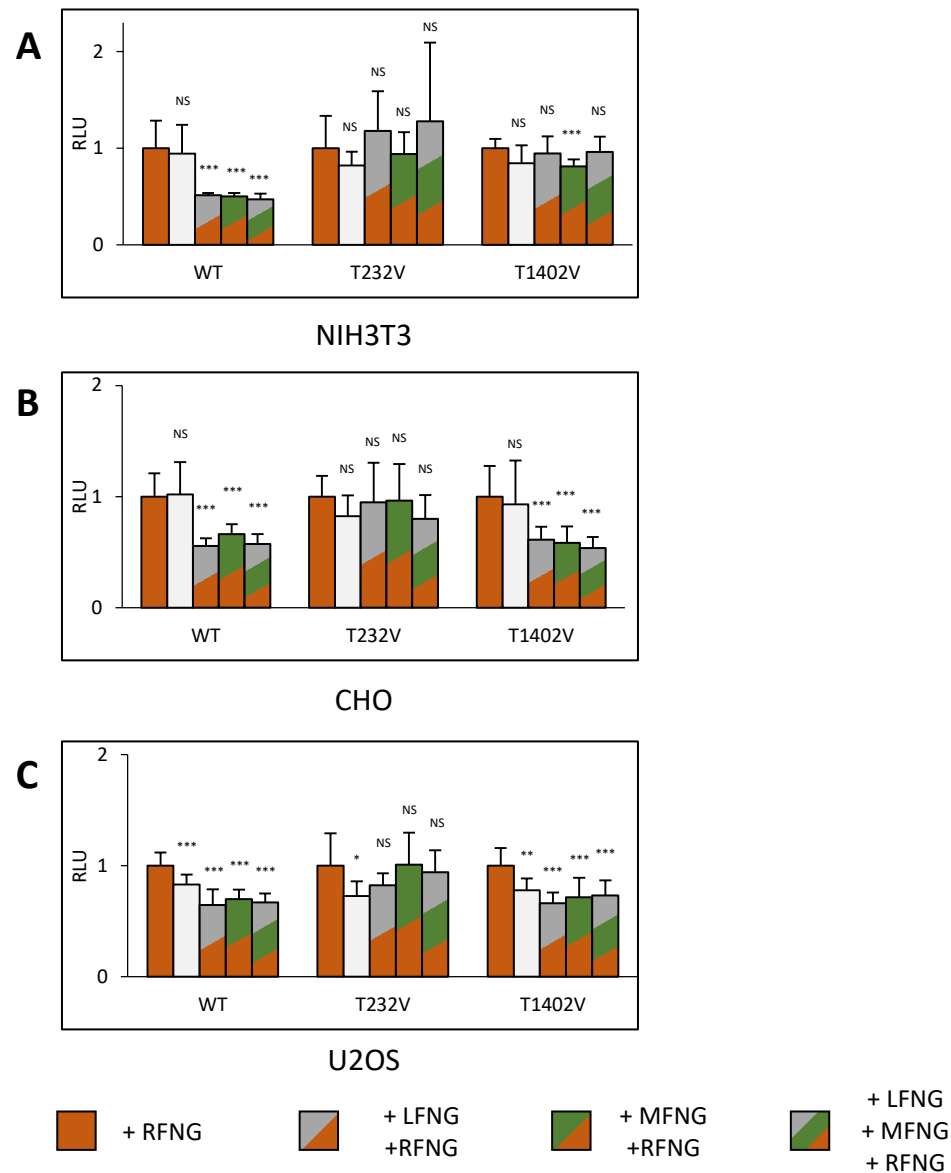

**Figure S5: Effect of the mutation of EGF6 or 36 O-fucosylation sites on Fringe dominance associated with N1 signaling induced by JAG1.** (A) NIH3T3, (B) CHO and (C) U2OS were co-transfected with plasmids encoding full-length mouse wild-type (WT) N1 or mutated on EGF6 (T<sup>232</sup>V) or 36 (T<sup>1402</sup>V) O-fucosylation site with empty vector (EV) or Lunatic Fringe (LFNG) and/or Manic Fringe (MFNG) and/or Radical Fringe (RFNG), then cell-based co-culture N1 activation assays was performed with L-cell stably overexpressed JAG1. Relative Luciferase units (RLU) compared to RFNG (normalized to 1 for each condition and cell line) were determined. Statistical significance was calculated using one-way ANOVA. Bar graph shows mean  $\pm$  SD; four or five independent experiments (depending on the cell line)  $n = 8$  to  $10$  were analyzed (\*\*\*,  $p < 0.005$ ; \*\*,  $p < 0.01$ ; \*,  $p < 0.05$ ).

## EGF 3

NGGTCDLLTLTEYK

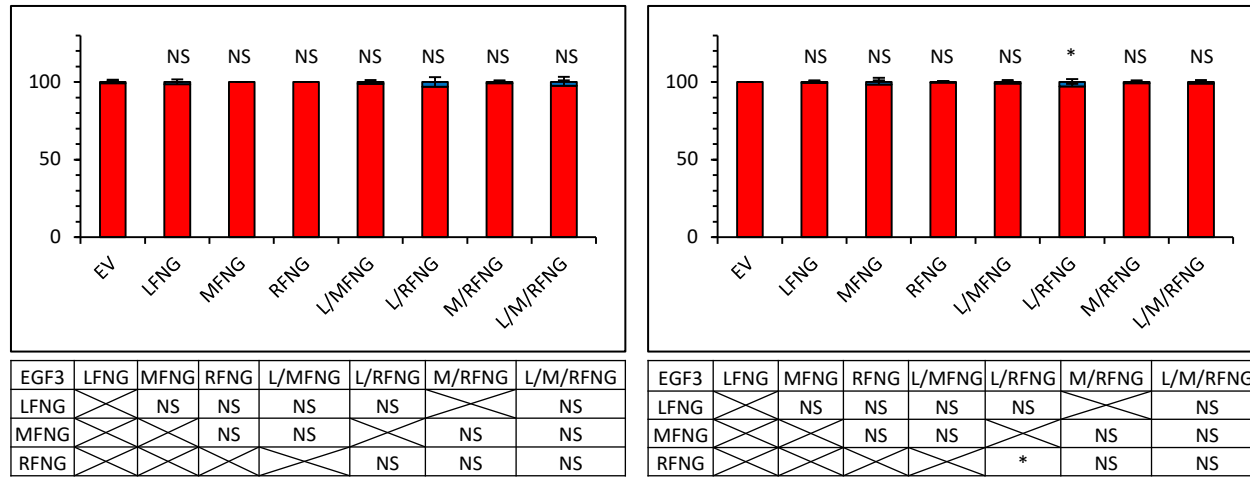

## EGF 5

ICRCPPGFHGPTRQDVNECSQNPGLCRHGGTCHNEIGSY

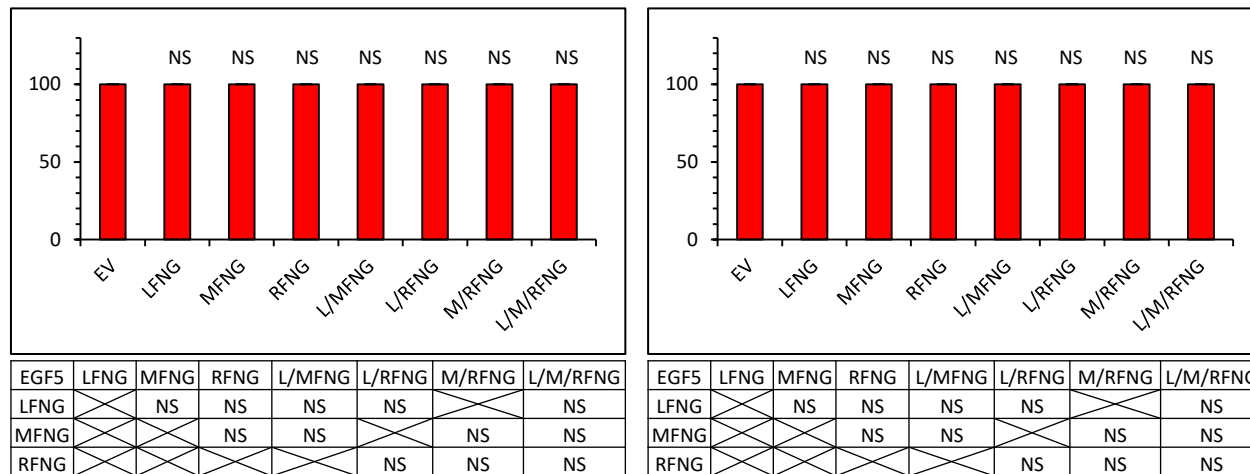

CHO

U2OS

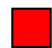

O-fucosylated

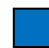

Elongated

**Figure S6: O-fucosylation profile of EGF3 and 5 of the N1 receptor in the presence of LFNG, MFNG and RFNG.** Quantification of the percentage of peptides modified by a O-fucose (red) and elongated O-fucose (blue) by at least a GlcNAc. The Extracted Ion Chromatogram (EIC) of the Mass Spectrometry (MS) data of peptides derived from mouse N1 EGF1-18 overexpressed with EV, LFNG, MFNG, RFNG, LFNG + MFNG, LFNG + RFNG, MFNG + RFNG or LFNG + MFNG + RFNG in CHO and U2OS were used for the quantification. Statistical significance was calculated using one-way ANOVA. Bar graph shows mean  $\pm$  SD; three or four independent experiments (depending on the cell line)  $n = 3$  to 4 were analyzed (\*\*\*,  $p < 0.005$ ; \*\*,  $p < 0.01$ ; \*,  $p < 0.05$ ). The data used to generate the EICs are available in the Table S4 to S27 (CHO) and Table S28 to S51 (U2OS). The ions used to generate the EICs are in Table S3.

### Figure S7A

**EGF 2 : <sup>53</sup>VGQRCQDSNPCLSTPCKNAGTCHVVDHGGTVDY<sup>85</sup>**

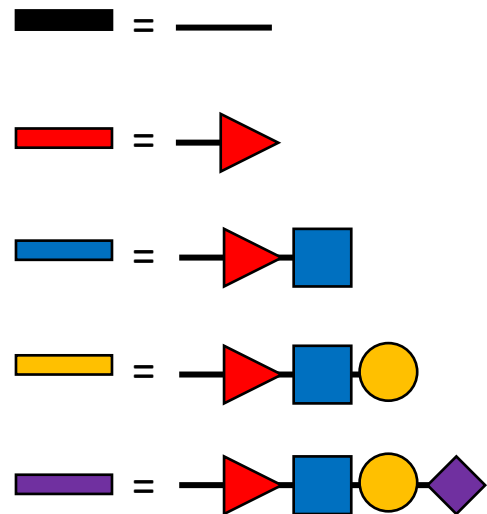

| #1 | b <sup>+</sup> | b <sup>2+</sup> | b <sup>3+</sup> | b <sup>4+</sup> | Seq.         | y <sup>+</sup> | y <sup>2+</sup> | y <sup>3+</sup> | y <sup>4+</sup> | #2 |
|----|----------------|-----------------|-----------------|-----------------|--------------|----------------|-----------------|-----------------|-----------------|----|
| 1  | 100.07569      | 50.54148        | 34.03008        | 25.77438        | V            |                |                 |                 |                 | 33 |
| 2  | 157.09715      | 79.05222        | 53.03724        | 40.02975        | G            | 4162.72164     | 2081.86446      | 1388.24540      | 1041.43587      | 32 |
| 3  | 285.15573      | 143.08150       | 95.72343        | 72.04439        | Q            | 4105.70018     | 2053.35373      | 1369.23824      | 1027.18050      | 31 |
| 4  | 441.25684      | 221.13206       | 147.75713       | 111.06967       | R            | 3977.64160     | 1989.32444      | 1326.55205      | 995.16586       | 30 |
| 5  | 601.28749      | 301.14738       | 201.10068       | 151.07733       | C-Carbami... | 3821.54049     | 1911.27388      | 1274.51835      | 956.14058       | 29 |
| 6  | 729.34607      | 365.17667       | 243.78687       | 183.09197       | Q            | 3661.50984     | 1831.25856      | 1221.17480      | 916.13292       | 28 |
| 7  | 844.37301      | 422.69014       | 282.12919       | 211.84871       | D            | 3533.45127     | 1767.22927      | 1178.48861      | 884.11827       | 27 |
| 8  | 931.40504      | 466.20616       | 311.13986       | 233.60672       | S            | 3418.42432     | 1709.71580      | 1140.14629      | 855.36154       | 26 |
| 9  | 1045.44797     | 523.22762       | 349.15417       | 262.11745       | N            | 3331.39229     | 1666.19979      | 1111.13562      | 833.60353       | 25 |
| 10 | 1142.50073     | 571.75400       | 381.50509       | 286.38064       | P            | 3217.34937     | 1609.17832      | 1073.12131      | 805.09280       | 24 |
| 11 | 1302.53138     | 651.76933       | 434.84864       | 326.38830       | C-Carbami... | 3120.29660     | 1560.65194      | 1040.77039      | 780.82963       | 23 |
| 12 | 1415.61544     | 708.31136       | 472.54333       | 354.65932       | L            | 2960.26595     | 1480.63662      | 987.42684       | 740.82195       | 22 |
| 13 | 1502.64747     | 751.82737       | 501.55401       | 376.41733       | S            | 2847.18189     | 1424.09458      | 949.73215       | 712.55093       | 21 |
| 14 | 1749.75306     | 875.38017       | 583.92254       | 438.19372       | T-Fuc(T)     | 2760.14986     | 1380.57857      | 920.72147       | 690.79292       | 20 |
| 15 | 1846.80582     | 923.90655       | 616.27346       | 462.05691       | P            | 2513.04427     | 1257.02578      | 838.35294       | 629.01653       | 19 |
| 16 | 2006.83647     | 1003.92187      | 669.61701       | 502.46458       | C-Carbami... | 2415.99151     | 1208.49939      | 806.00202       | 604.75334       | 18 |
| 17 | 2134.93143     | 1067.96936      | 712.31533       | 534.48832       | K            | 2255.96086     | 1128.48407      | 752.65847       | 564.74567       | 17 |
| 18 | 2248.97436     | 1124.99082      | 750.32964       | 562.99005       | N            | 2127.86590     | 1064.43659      | 709.96150       | 532.72193       | 16 |
| 19 | 2320.01148     | 1160.50938      | 774.00868       | 580.75833       | A            | 2013.82297     | 1007.41512      | 671.94584       | 504.21120       | 15 |
| 20 | 2377.03294     | 1189.02011      | 793.01583       | 595.01369       | G            | 1942.78586     | 971.89657       | 648.26680       | 486.45192       | 14 |
| 21 | 2904.21796     | 1452.61262      | 968.74417       | 726.80995       | T-Hex(1)P... | 1885.76439     | 943.38584       | 629.25965       | 472.19656       | 13 |
| 22 | 3064.24861     | 1532.62794      | 1022.08772      | 766.81761       | C-Carbami... | 1358.57938     | 679.79333       | 453.53131       | 340.40030       | 12 |
| 23 | 3201.30752     | 1601.15740      | 1067.77402      | 801.08234       | H            | 1198.54873     | 599.77800       | 400.18776       | 300.39264       | 11 |
| 24 | 3300.37593     | 1650.69160      | 1100.79683      | 825.84944       | V            | 1061.48981     | 531.24855       | 354.50146       | 266.12791       | 10 |
| 25 | 3399.44435     | 1700.22581      | 1133.81963      | 850.61654       | V            | 962.42140      | 481.71434       | 321.47865       | 241.36081       | 9  |
| 26 | 3514.47129     | 1757.73928      | 1172.16195      | 879.37328       | D            | 863.35299      | 432.18013       | 288.45585       | 216.59370       | 8  |
| 27 | 3651.53020     | 1826.26874      | 1217.84825      | 913.63001       | H            | 748.32604      | 374.66666       | 250.11353       | 187.83697       | 7  |
| 28 | 3708.55166     | 1854.77947      | 1236.85541      | 927.89337       | G            | 611.26713      | 306.13720       | 204.42723       | 153.57224       | 6  |
| 29 | 3765.57313     | 1883.29020      | 1255.86256      | 942.14874       | G            | 554.24567      | 277.62647       | 185.42007       | 139.31687       | 5  |
| 30 | 3866.62081     | 1933.81404      | 1289.54512      | 967.41066       | T            | 497.22420      | 249.11574       | 166.41292       | 125.06151       | 4  |
| 31 | 3965.68922     | 1983.34825      | 1322.56792      | 992.17776       | V            | 396.17653      | 198.59190       | 132.73036       | 99.79959        | 3  |
| 32 | 4080.71616     | 2040.86172      | 1360.91024      | 1020.93450      | D            | 297.10811      | 149.05769       | 99.70756        | 75.03249        | 2  |
| 33 |                |                 |                 |                 | Y            | 182.08117      | 91.54422        | 61.36524        | 46.27575        |    |

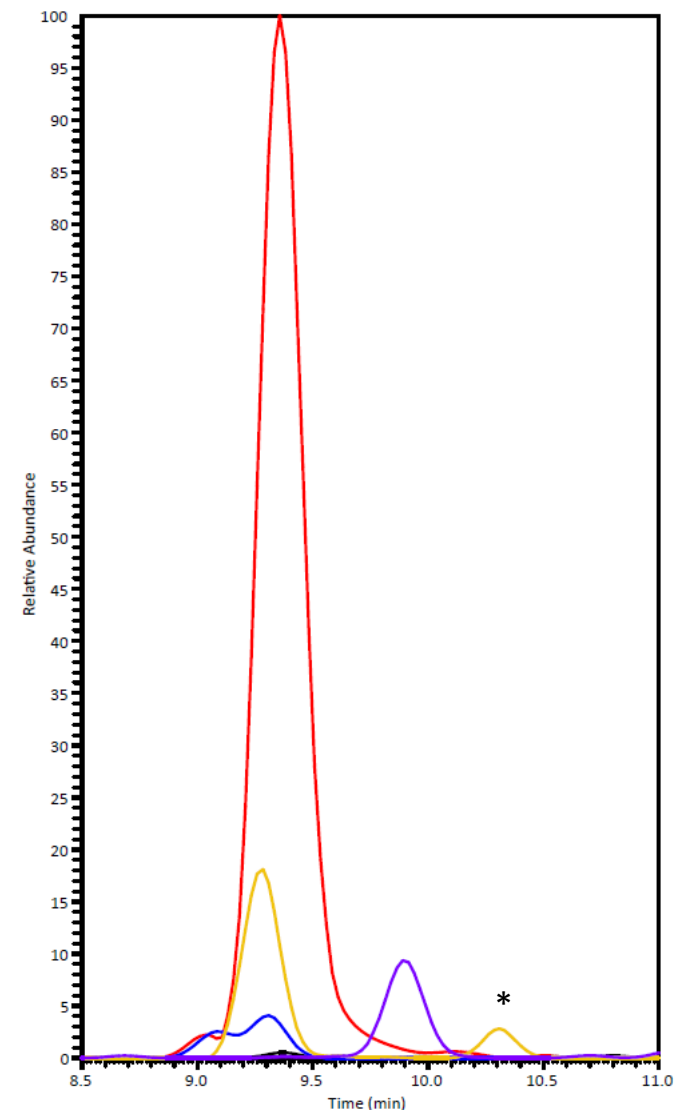

FP040621\_17.raw #3571 RT: 9.3178 min  
FTMS, 1066.7068@hcd27.00, z=+4, Mono m/z=1066.20508 Da, MH+=4261.79848 Da, Match Tol.=20 ppm

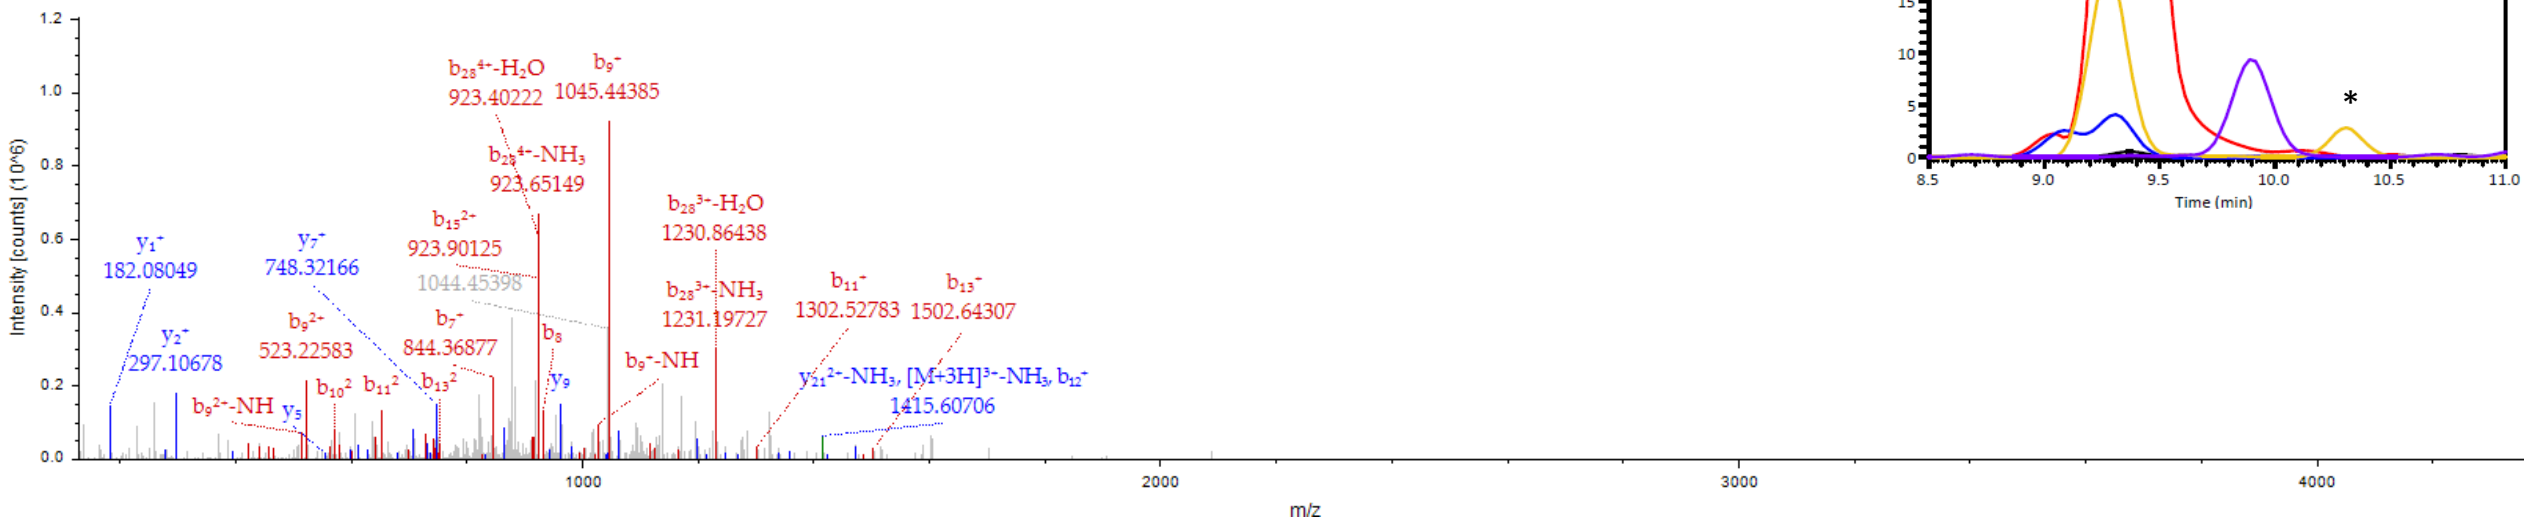

Figure S7B

EGF 3 : <sup>113</sup>NGG**T**CDLLTLTEYK<sup>126</sup>

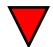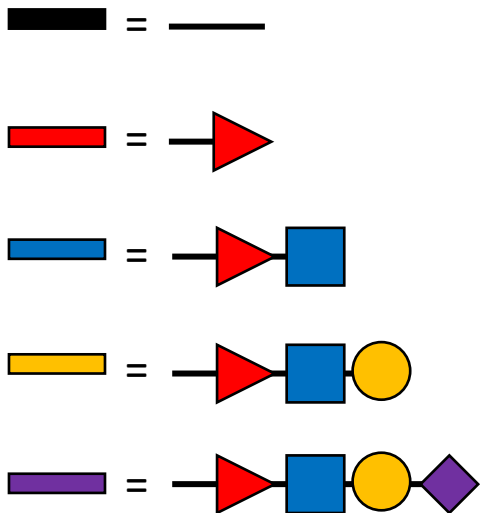

| #1 | b <sup>+</sup> | b <sup>2+</sup> | Seq.         | y <sup>+</sup> | y <sup>2+</sup> | #2 |
|----|----------------|-----------------|--------------|----------------|-----------------|----|
| 1  | 115.05020      | 58.02874        | N            |                |                 | 14 |
| 2  | 172.07167      | 86.53947        | G            | 1616.77238     | 808.88983       | 13 |
| 3  | 229.09313      | 115.05020       | G            | 1559.75092     | 780.37910       | 12 |
| 4  | 476.19872      | 238.60300       | T-Fuc(1)     | 1502.72945     | 751.86836       | 11 |
| 5  | 636.22937      | 318.61832       | C-Carbami... | 1255.62387     | 628.31557       | 10 |
| 6  | 751.25631      | 376.13179       | D            | 1095.59322     | 548.30025       | 9  |
| 7  | 864.34037      | 432.67383       | L            | 980.56627      | 490.78678       | 8  |
| 8  | 977.42444      | 489.21586       | L            | 867.48221      | 434.24474       | 7  |
| 9  | 1078.47212     | 539.73970       | T            | 754.39815      | 377.70271       | 6  |
| 10 | 1191.55618     | 596.28173       | L            | 653.35047      | 327.17887       | 5  |
| 11 | 1292.60386     | 646.80557       | T            | 540.26640      | 270.63684       | 4  |
| 12 | 1421.64645     | 711.32686       | E            | 439.21873      | 220.11300       | 3  |
| 13 | 1584.70978     | 792.85853       | Y            | 310.17613      | 155.59170       | 2  |
| 14 |                |                 | K            | 147.11280      | 74.06004        | 1  |

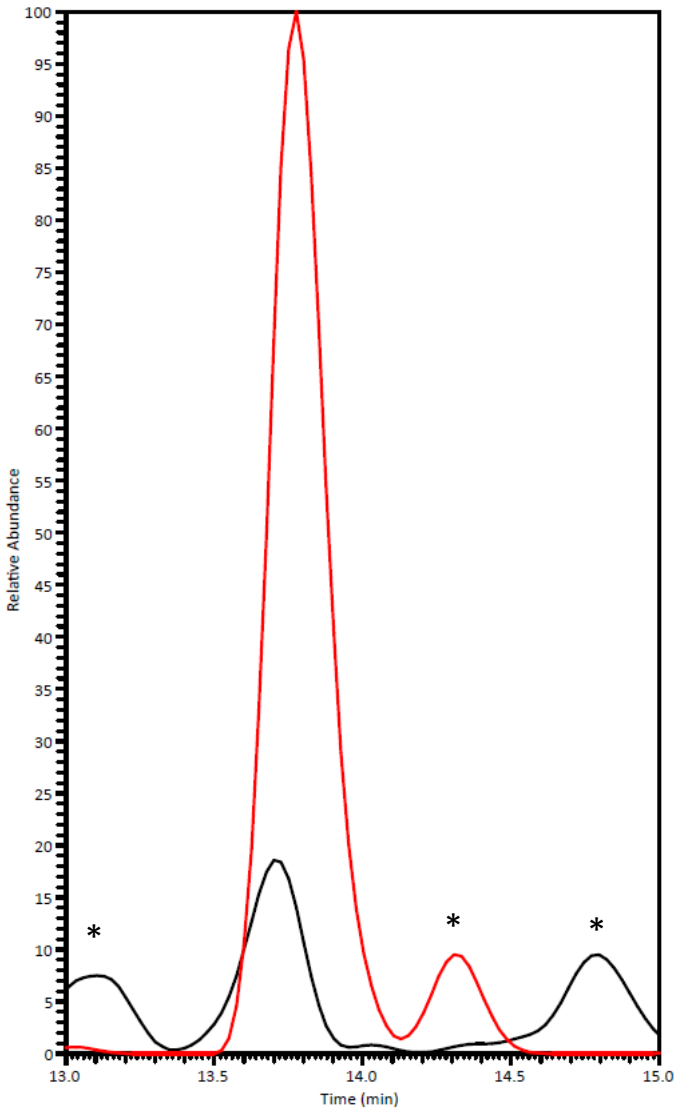

FP022421\_1.raw #5/85 RI: 13.8662 min  
FTMS, 865.9122@hcd27.00, z=+2, Mono m/z=865.91223 Da, MH+=1730.81719 Da, Match Tol.=20 ppm

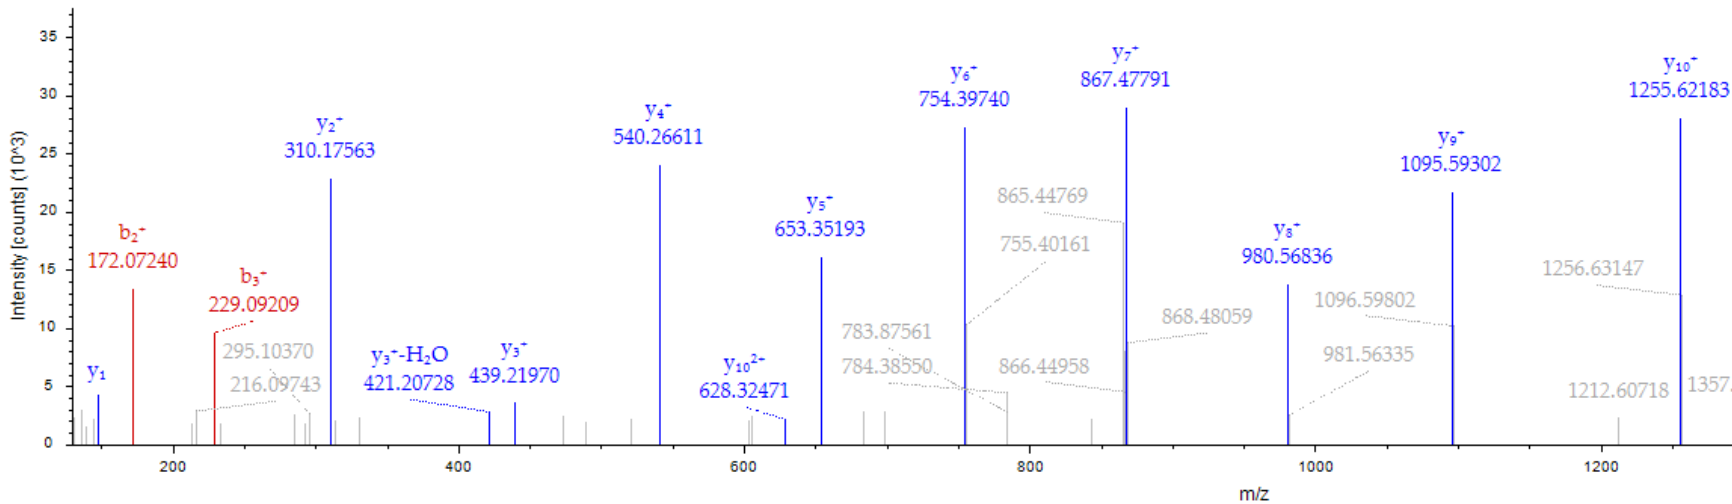

Figure S7C

EGF 5 : <sup>163</sup>I<sup>163</sup>CRCPGPFHGP<sup>163</sup>TCRQDVNECSQNPGLCRHGGTCHNEIGSY<sup>202</sup>

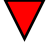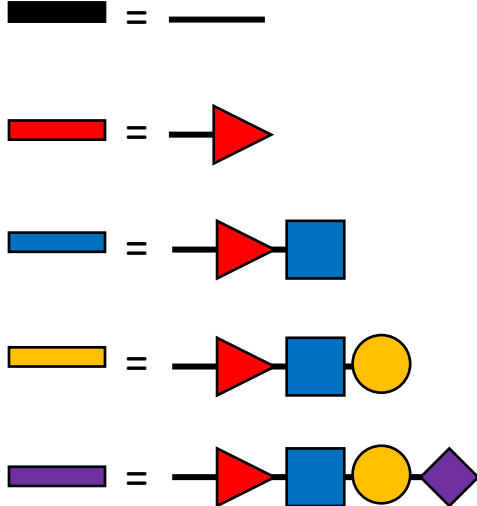

| #1 | b <sup>+</sup> | b <sup>2+</sup> | b <sup>3+</sup> | b <sup>4+</sup> | b <sup>5+</sup> | b <sup>6+</sup> | Seq.         | y <sup>+</sup> | y <sup>2+</sup> | y <sup>3+</sup> | y <sup>4+</sup> | y <sup>5+</sup> | y <sup>6+</sup> | #2 |
|----|----------------|-----------------|-----------------|-----------------|-----------------|-----------------|--------------|----------------|-----------------|-----------------|-----------------|-----------------|-----------------|----|
| 1  | 114.09134      | 57.54931        | 38.70196        | 29.27829        | 23.62409        | 19.85462        | I            | 4717.96531     | 2359.48629      | 1573.32662      | 1180.24679      | 944.39888       | 787.16695       | 40 |
| 2  | 274.12199      | 137.56463       | 92.04551        | 69.28595        | 55.63022        | 46.52640        | C-Carbami... | 4557.93466     | 2279.47097      | 1519.98307      | 1140.23912      | 912.39275       | 760.49517       | 39 |
| 3  | 430.22310      | 215.61519       | 144.07922       | 108.31123       | 86.85044        | 72.54325        | R            | 4401.83355     | 2201.42041      | 1467.94397      | 1101.21385      | 881.17253       | 734.47832       | 38 |
| 4  | 590.25375      | 295.63051       | 197.42277       | 148.31889       | 118.85657       | 99.21502        | C-Carbami... | 4241.80290     | 2121.40509      | 1414.60682      | 1061.20618      | 849.16640       | 707.80655       | 37 |
| 5  | 687.30651      | 344.15689       | 229.77369       | 172.58209       | 138.26712       | 115.39048       | P            | 4144.75014     | 2072.87871      | 1382.25490      | 1036.94299      | 829.75585       | 691.63109       | 36 |
| 6  | 784.35928      | 392.68328       | 262.12461       | 196.84528       | 157.67768       | 131.56594       | P            | 4047.69737     | 2024.35233      | 1349.90398      | 1012.67980      | 810.34530       | 675.45563       | 35 |
| 7  | 841.38074      | 421.19401       | 281.13176       | 211.10064       | 169.08197       | 141.06952       | G            | 3990.67591     | 1995.84159      | 1330.89682      | 998.42444       | 798.94100       | 665.95205       | 34 |
| 8  | 988.44915      | 494.72822       | 330.15457       | 247.86775       | 198.49565       | 165.58092       | F            | 3843.60750     | 1922.30739      | 1281.87402      | 961.65733       | 769.52732       | 641.44065       | 33 |
| 9  | 1125.50807     | 563.25767       | 375.84087       | 282.13247       | 225.90743       | 188.42407       | H            | 3706.54859     | 1853.77793      | 1236.18771      | 927.39260       | 742.11554       | 618.59749       | 32 |
| 10 | 1182.52953     | 591.76840       | 394.84803       | 296.38784       | 237.31173       | 197.92765       | G            | 3649.52712     | 1825.26720      | 1217.18056      | 913.13724       | 730.71125       | 609.09392       | 30 |
| 11 | 1279.58229     | 640.29478       | 427.19895       | 320.65103       | 256.72228       | 214.10311       | T-Fuc(1)     | 3552.47436     | 1776.74082      | 1184.82964      | 888.87405       | 711.30069       | 592.91846       | 29 |
| 12 | 1526.68788     | 763.84758       | 509.56748       | 382.42743       | 306.14340       | 255.28738       | C-Carbami... | 3305.36877     | 1653.18802      | 1102.46111      | 827.09765       | 661.87958       | 551.73419       | 28 |
| 13 | 1686.71853     | 843.86290       | 562.91103       | 422.43509       | 338.14953       | 281.95915       | R            | 3145.33812     | 1573.17270      | 1049.11756      | 787.08999       | 629.87345       | 525.06242       | 27 |
| 14 | 1842.81964     | 921.91346       | 614.94473       | 461.46037       | 369.36975       | 307.97600       | Q            | 2989.23701     | 1495.12214      | 997.08385       | 748.06471       | 598.65322       | 499.04557       | 26 |
| 15 | 1970.87822     | 985.94275       | 657.63092       | 493.47501       | 394.98146       | 329.31910       | D            | 2861.17843     | 1431.09286      | 954.39766       | 716.05007       | 573.04151       | 477.70247       | 25 |
| 16 | 2085.90516     | 1043.45622      | 695.97324       | 522.23175       | 417.98685       | 348.49026       | V            | 2746.15149     | 1373.57938      | 916.05535       | 687.29333       | 560.03612       | 458.53131       | 24 |
| 17 | 2184.97357     | 1092.99043      | 728.99604       | 546.99885       | 437.80054       | 365.00166       | N            | 2647.08308     | 1324.04518      | 883.03254       | 662.52623       | 530.22244       | 442.01991       | 23 |
| 18 | 2299.01650     | 1150.01189      | 767.01035       | 575.50958       | 460.60912       | 384.00881       | E            | 2533.04015     | 1267.02371      | 845.01823       | 634.01549       | 507.41385       | 423.01276       | 22 |
| 19 | 2428.05909     | 1214.53319      | 810.02455       | 607.77023       | 486.41764       | 405.51591       | C-Carbami... | 2403.99756     | 1202.50242      | 802.00404       | 601.75485       | 481.60533       | 401.50566       | 21 |
| 20 | 2588.08974     | 1294.54851      | 863.36810       | 647.77789       | 518.42377       | 432.18769       | S            | 2243.96691     | 1122.48709      | 748.66049       | 561.74718       | 449.59920       | 374.83388       | 20 |
| 21 | 2675.12177     | 1338.06452      | 892.37877       | 669.53590       | 535.83018       | 446.69303       | Q            | 2156.93488     | 1078.97108      | 719.64981       | 539.98918       | 432.19280       | 360.32854       | 19 |
| 22 | 2803.18035     | 1402.09381      | 935.06497       | 701.55054       | 561.44189       | 468.03612       | N            | 2028.87630     | 1014.94179      | 676.96362       | 507.97453       | 406.58108       | 338.98545       | 18 |
| 23 | 2917.22328     | 1459.11528      | 973.07928       | 730.06128       | 584.25048       | 487.04328       | P            | 1914.83337     | 957.92033       | 638.94931       | 479.46380       | 383.77250       | 319.97829       | 17 |
| 24 | 3014.27604     | 1507.64166      | 1005.43020      | 754.32447       | 603.66103       | 503.21874       | G            | 1817.78061     | 909.39394       | 606.59839       | 455.20061       | 364.36194       | 303.80283       | 16 |
| 25 | 3071.29750     | 1536.15239      | 1024.43735      | 768.57983       | 615.06532       | 512.72231       | L            | 1760.75915     | 880.88321       | 587.59123       | 440.94524       | 352.95765       | 294.29926       | 15 |
| 26 | 3184.38157     | 1592.69442      | 1062.13204      | 796.85085       | 637.68213       | 531.56966       | C-Carbami... | 1647.67508     | 824.34118       | 549.89655       | 412.67423       | 330.34084       | 275.45191       | 14 |
| 27 | 3344.41222     | 1672.70975      | 1115.47559      | 836.85851       | 669.68826       | 558.24143       | R            | 1487.64443     | 744.32586       | 496.55300       | 372.66657       | 298.33471       | 248.78014       | 13 |
| 28 | 3500.51333     | 1750.76030      | 1167.50929      | 875.88379       | 700.90849       | 584.25828       | H            | 1331.54332     | 666.27530       | 444.51929       | 333.64129       | 267.11449       | 222.76328       | 12 |
| 29 | 3637.57224     | 1819.28976      | 1213.19560      | 910.14852       | 728.32027       | 607.10144       | G            | 1194.48441     | 597.74584       | 398.83299       | 299.37656       | 239.70270       | 199.92013       | 11 |
| 30 | 3694.59370     | 1847.80049      | 1232.20275      | 924.40388       | 739.72456       | 616.60501       | G            | 1137.46295     | 569.23511       | 379.82583       | 285.12119       | 228.29841       | 190.41656       | 10 |
| 31 | 3751.61517     | 1876.31122      | 1251.20991      | 938.65925       | 751.12885       | 626.10859       | T            | 1080.44148     | 540.72438       | 360.81868       | 270.86583       | 216.89412       | 180.91298       | 9  |
| 32 | 3852.66284     | 1926.83506      | 1284.89247      | 963.92117       | 771.33839       | 642.94987       | C-Carbami... | 979.39381      | 490.20054       | 327.13612       | 245.60391       | 196.68458       | 164.07170       | 8  |
| 33 | 4012.69349     | 2006.85038      | 1338.23602      | 1003.92883      | 803.34452       | 669.62165       | H            | 819.36316      | 410.18522       | 273.79257       | 205.59625       | 164.67845       | 137.39992       | 7  |
| 34 | 4149.75240     | 2075.37984      | 1383.92232      | 1038.19356      | 830.75630       | 692.46480       | N            | 682.30425      | 341.65576       | 228.10627       | 171.33152       | 137.26667       | 114.55677       | 6  |
| 35 | 4263.79533     | 2132.40130      | 1421.93663      | 1066.70429      | 853.56489       | 711.47195       | E            | 568.26132      | 284.63430       | 190.09196       | 142.82079       | 114.45809       | 95.54962        | 5  |
| 36 | 4392.83792     | 2196.92260      | 1464.95083      | 1098.96494      | 879.37341       | 732.97905       | I            | 439.21873      | 220.11300       | 147.07776       | 110.56014       | 88.64957        | 74.04252        | 4  |
| 37 | 4505.92199     | 2253.46463      | 1502.64551      | 1127.23595      | 901.99022       | 751.82640       | G            | 326.13466      | 163.57097       | 109.38307       | 82.28912        | 66.03275        | 55.19517        | 3  |
| 38 | 4562.94345     | 2281.97536      | 1521.65267      | 1141.49132      | 913.39451       | 761.32997       | S            | 269.11320      | 135.06024       | 90.37592        | 68.03376        | 54.62846        | 45.69160        | 2  |
| 39 | 4649.97548     | 2325.49138      | 1550.66334      | 1163.24933      | 930.80092       | 775.83531       | Y            | 182.08117      | 91.54422        | 61.36524        | 46.27575        | 37.22206        | 31.18626        | 1  |
| 40 |                |                 |                 |                 |                 |                 |              |                |                 |                 |                 |                 |                 |    |

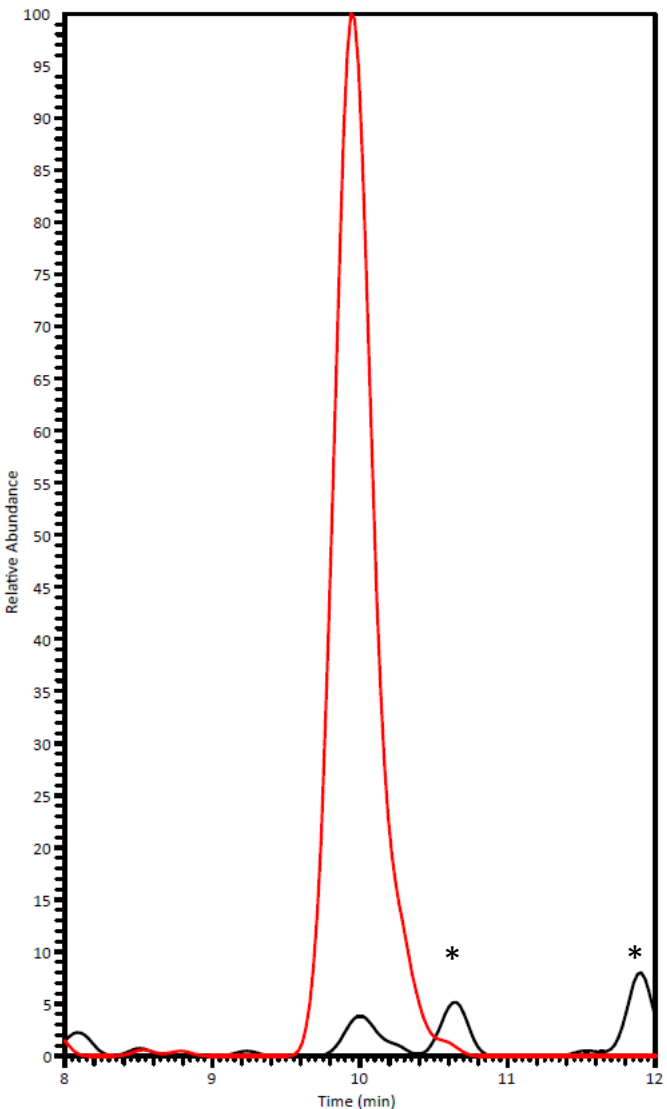

FP040621\_17.raw #3822 RT: 9.8943 min  
FTMS, 806.3533@hcd27.00, z=+6, Mono m/z=806.01978 Da, MH+=4831.08227 Da, Match Tol.=20 ppm

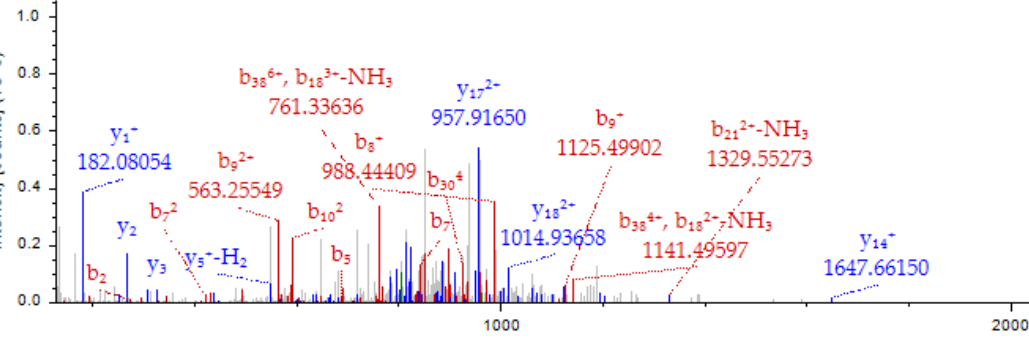



Figure S7D

EGF 6 : <sup>199</sup>IGSYRCACRATHTGPHCELPYVPCSPCQNGGTCRPTGDTTHE<sup>242</sup>

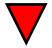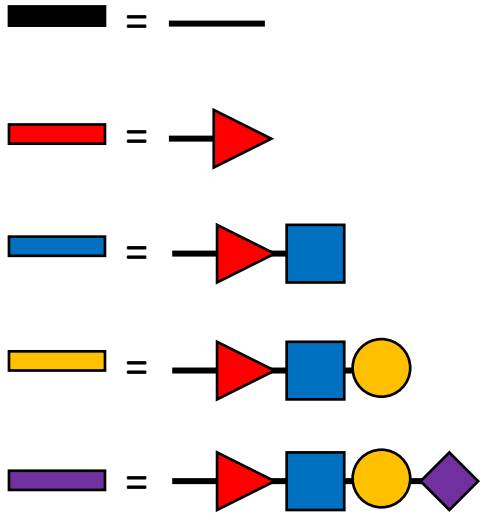

| #1 | b <sup>+</sup> | b <sup>2+</sup> | b <sup>3+</sup> | b <sup>4+</sup> | b <sup>5+</sup> | Seq.         | y <sup>+</sup> | y <sup>2+</sup> | y <sup>3+</sup> | y <sup>4+</sup> | y <sup>5+</sup> | #2 |
|----|----------------|-----------------|-----------------|-----------------|-----------------|--------------|----------------|-----------------|-----------------|-----------------|-----------------|----|
| 1  | 114.09134      | 57.54931        | 38.70196        | 29.27829        | 23.62409        | I            |                |                 |                 |                 |                 | 44 |
| 2  | 171.11280      | 86.06004        | 57.70912        | 43.53366        | 35.02838        | G            | 5036.09678     | 2518.55203      | 1679.37044      | 1259.77965      | 1008.02518      | 43 |
| 3  | 258.14483      | 129.57605       | 86.71980        | 65.29167        | 52.43479        | S            | 4979.07531     | 2490.04130      | 1660.36329      | 1245.52429      | 996.62088       | 42 |
| 4  | 421.20816      | 211.10772       | 141.07424       | 106.05760       | 85.04745        | Y            | 4892.04329     | 2446.52528      | 1631.35261      | 1223.76628      | 979.21448       | 41 |
| 5  | 577.30927      | 289.15827       | 193.10794       | 145.08278       | 116.26768       | R            | 4728.97996     | 2364.99362      | 1576.99817      | 1183.00045      | 946.60181       | 40 |
| 6  | 737.33992      | 369.17360       | 246.45149       | 185.09044       | 148.27381       | C-Carbami... | 4572.87885     | 2286.94306      | 1524.96447      | 1143.97517      | 915.38159       | 39 |
| 7  | 808.37703      | 404.69216       | 270.13053       | 202.84972       | 162.48123       | A            | 4412.84820     | 2206.92774      | 1471.62092      | 1103.96751      | 883.37546       | 38 |
| 8  | 968.40768      | 484.70748       | 323.47408       | 242.85738       | 194.48736       | C-Carbami... | 4341.81108     | 2171.40918      | 1447.94188      | 1086.20823      | 869.16804       | 37 |
| 9  | 1124.50879     | 562.75804       | 375.50778       | 281.88266       | 225.70758       | R            | 4181.78044     | 2091.39386      | 1394.59833      | 1046.20057      | 837.16191       | 36 |
| 10 | 1195.54591     | 598.27659       | 399.18682       | 299.64193       | 239.91500       | A            | 4025.67932     | 2013.34330      | 1342.56463      | 1007.17529      | 805.94169       | 35 |
| 11 | 1296.59359     | 648.80043       | 432.86938       | 324.90385       | 260.12454       | T            | 3954.64221     | 1977.82474      | 1318.88559      | 989.41601       | 791.73426       | 34 |
| 12 | 1433.65250     | 717.32989       | 478.55658       | 359.16858       | 287.53632       | H            | 3853.59453     | 1927.30090      | 1285.20303      | 964.15409       | 771.52473       | 33 |
| 13 | 1534.70018     | 767.85373       | 512.23824       | 384.43050       | 307.74586       | T            | 3716.53562     | 1858.77145      | 1239.51672      | 929.88936       | 744.11295       | 32 |
| 14 | 1591.72164     | 796.36446       | 531.24540       | 398.68587       | 319.15015       | G            | 3615.48794     | 1808.24761      | 1205.83417      | 904.62744       | 723.90341       | 31 |
| 15 | 1688.77440     | 844.89084       | 563.59632       | 422.94906       | 338.56070       | P            | 3558.46648     | 1779.73688      | 1186.82701      | 890.37208       | 712.49912       | 30 |
| 16 | 1825.83332     | 913.42030       | 609.28262       | 457.21379       | 365.97248       | H            | 3461.41372     | 1731.21050      | 1154.47609      | 866.10889       | 693.08856       | 29 |
| 17 | 1985.86396     | 993.43562       | 662.62617       | 497.22145       | 397.97861       | C-Carbami... | 3324.35480     | 1662.68104      | 1108.78979      | 831.84416       | 665.67678       | 28 |
| 18 | 2114.90656     | 1057.95692      | 705.64037       | 529.48210       | 423.78713       | E            | 3164.32415     | 1582.66572      | 1055.44624      | 791.83650       | 633.67065       | 27 |
| 19 | 2227.99062     | 1114.98959      | 743.33506       | 557.75311       | 446.40395       | L            | 3035.28156     | 1518.14442      | 1012.43204      | 759.57585       | 607.86213       | 26 |
| 20 | 2325.04338     | 1163.02533      | 775.68598       | 582.01630       | 465.81450       | P            | 2922.19750     | 1461.60239      | 974.73735       | 731.30483       | 585.24532       | 25 |
| 21 | 2488.10671     | 1244.55699      | 830.04042       | 622.78214       | 498.42716       | Y            | 2825.14473     | 1413.07601      | 942.38643       | 707.04164       | 565.83477       | 24 |
| 22 | 2587.17513     | 1294.09120      | 863.06323       | 647.54924       | 518.24085       | V            | 2662.08141     | 1331.54434      | 888.03199       | 666.27581       | 533.22210       | 23 |
| 23 | 2684.22789     | 1342.61758      | 895.41415       | 671.81243       | 537.65140       | P            | 2563.01299     | 1282.01013      | 855.00918       | 641.50871       | 513.40842       | 22 |
| 24 | 2844.25854     | 1422.63291      | 948.75770       | 711.82009       | 569.65753       | C-Carbami... | 2465.96023     | 1233.48375      | 822.65826       | 617.24551       | 493.99787       | 21 |
| 25 | 2931.29067     | 1466.14892      | 977.76837       | 733.57810       | 587.06393       | S            | 2306.32958     | 1153.46843      | 769.31471       | 577.23785       | 461.99174       | 20 |
| 26 | 3028.34333     | 1514.67530      | 1010.11929      | 757.84129       | 606.47449       | P            | 2218.89755     | 1109.95241      | 740.30403       | 555.47985       | 444.58533       | 19 |
| 27 | 3115.37536     | 1558.19132      | 1039.12997      | 779.59930       | 623.88089       | S            | 2121.84479     | 1061.42603      | 707.95311       | 531.21665       | 425.17478       | 18 |
| 28 | 3212.42812     | 1606.71770      | 1071.48089      | 803.86249       | 643.29145       | P            | 2034.81276     | 1017.91002      | 678.94244       | 509.45865       | 407.76837       | 17 |
| 29 | 3372.45877     | 1686.73302      | 1124.82444      | 843.87015       | 675.29758       | C-Carbami... | 1937.76000     | 969.38364       | 646.59152       | 485.19546       | 388.35782       | 16 |
| 30 | 3500.51735     | 1750.76231      | 1167.51063      | 875.88479       | 700.90929       | Q            | 1777.72935     | 889.36831       | 593.24797       | 445.18779       | 356.35169       | 15 |
| 31 | 3615.54429     | 1808.27578      | 1205.85295      | 904.64153       | 723.91468       | N-Deamid.    | 1649.67077     | 825.33902       | 550.56177       | 413.17315       | 330.73998       | 14 |
| 32 | 3672.56576     | 1836.78652      | 1224.86010      | 918.89690       | 735.31897       | G            | 1534.64383     | 767.82555       | 512.21946       | 384.41641       | 307.73459       | 13 |
| 33 | 3729.58722     | 1865.29725      | 1243.86726      | 933.15226       | 746.72327       | G            | 1477.62236     | 739.31482       | 493.21231       | 370.16105       | 296.33029       | 12 |
| 34 | 3976.69281     | 1988.85004      | 1326.23579      | 994.92866       | 796.14438       | T-Fuc(1)     | 1420.60090     | 710.80409       | 474.20515       | 355.90568       | 284.92600       | 11 |
| 35 | 4136.72346     | 2068.86537      | 1379.57934      | 1034.93632      | 828.15051       | C-Carbami... | 1173.49531     | 587.25129       | 391.83662       | 294.12929       | 235.50488       | 10 |
| 36 | 4292.82457     | 2146.91592      | 1431.61304      | 1073.96160      | 859.37073       | R            | 1013.46466     | 507.23597       | 338.49307       | 254.12162       | 203.49875       | 9  |
| 37 | 4389.87733     | 2195.44230      | 1463.96396      | 1098.22479      | 878.78129       | P            | 857.36355      | 429.18541       | 286.45937       | 215.09635       | 172.27853       | 8  |
| 38 | 4490.92501     | 2245.96614      | 1497.64652      | 1123.48671      | 898.99082       | T            | 760.31079      | 380.65903       | 254.10845       | 190.83315       | 152.86798       | 7  |
| 39 | 4547.94647     | 2274.47687      | 1516.65368      | 1137.74208      | 910.39512       | G            | 659.26311      | 330.13519       | 220.42589       | 165.57123       | 132.65844       | 6  |
| 40 | 4662.97342     | 2331.99035      | 1554.99599      | 1166.49881      | 933.40050       | D            | 602.24165      | 301.62446       | 201.41873       | 151.31587       | 121.25415       | 5  |
| 41 | 4764.02109     | 2382.51419      | 1588.67855      | 1191.76073      | 953.61004       | T            | 487.21470      | 244.11099       | 163.07642       | 122.55913       | 98.24876        | 4  |
| 42 | 4865.06877     | 2433.03802      | 1622.36111      | 1217.02265      | 973.81958       | T            | 386.16702      | 193.58715       | 129.39386       | 97.29721        | 78.03923        | 3  |
| 43 | 5002.12768     | 2501.56748      | 1668.04741      | 1251.28738      | 1001.23136      | H            | 285.11935      | 143.06331       | 95.71130        | 72.03529        | 57.82969        | 2  |
| 44 |                |                 |                 |                 |                 | E            | 148.06043      | 74.53386        | 50.02500        | 37.77057        | 30.41791        | 1  |

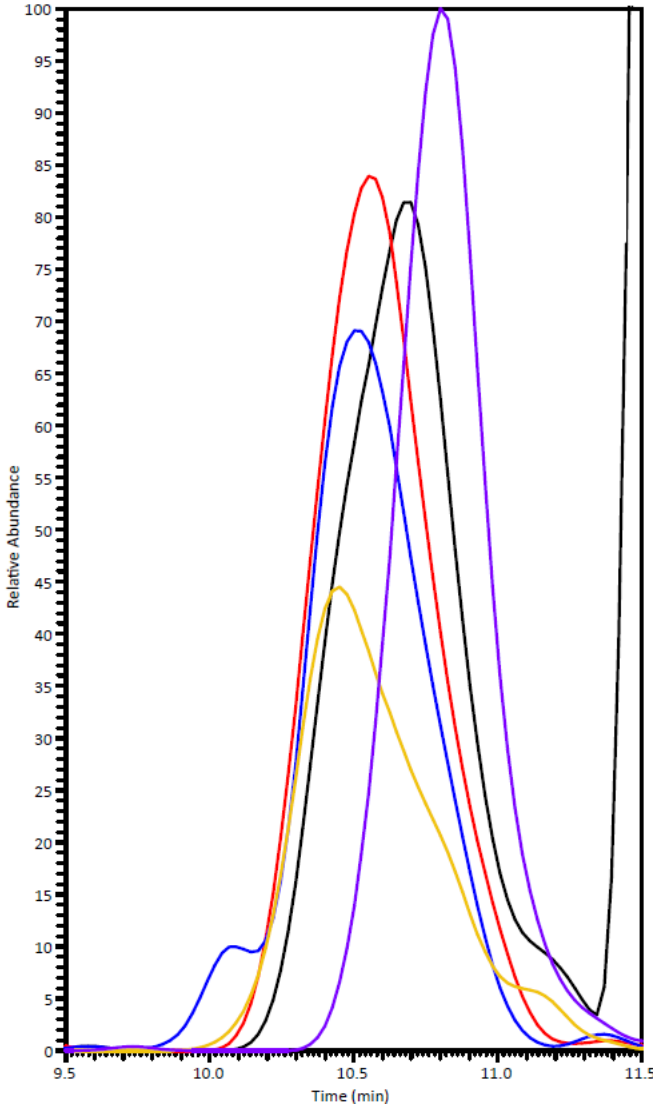

FP040621\_14.raw #4039 RT: 10.5590 min  
FTMS, 1031.0482@hcd27.00, z=+5, Mono m/z=1030.64575 Da, MH+=149.19965 Da, Match Tol.=20 ppm

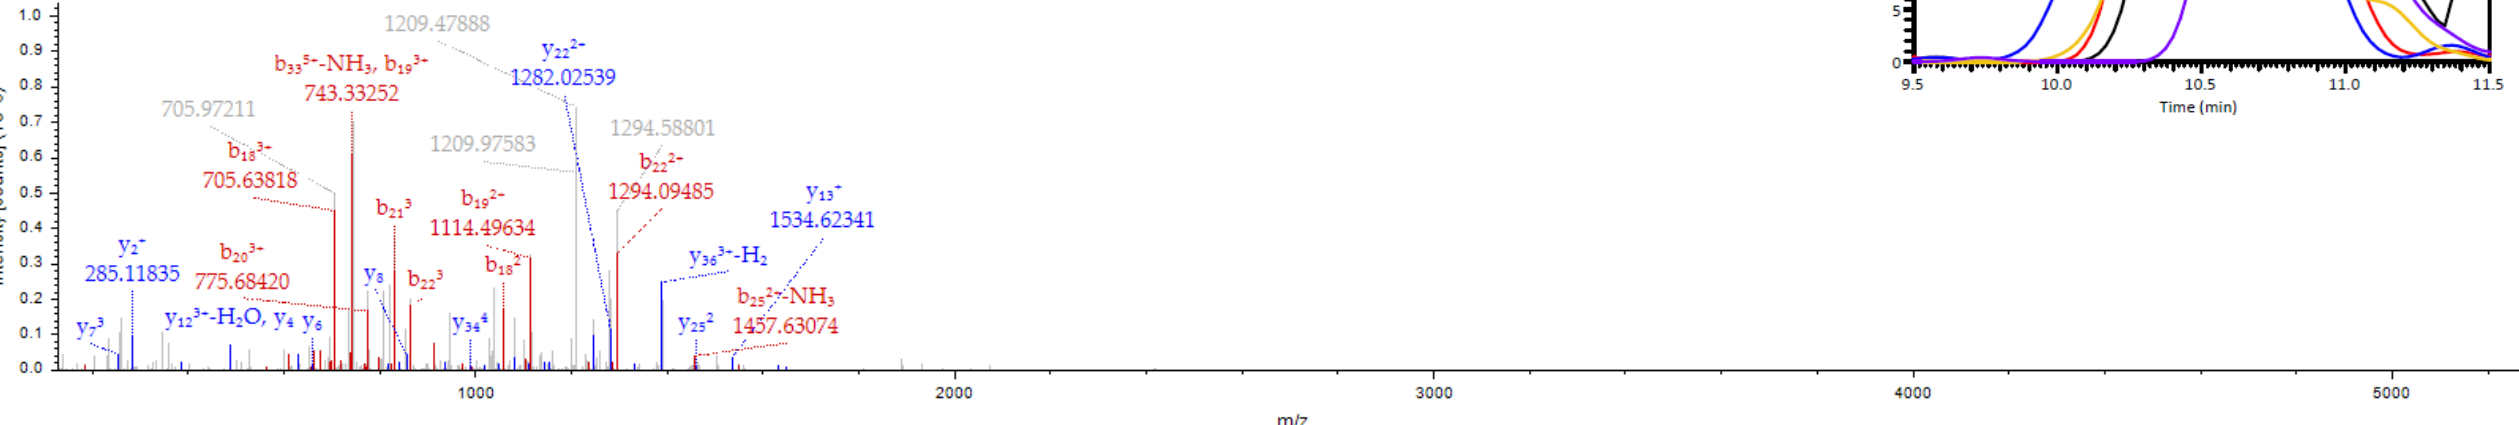

Figure S7E

EGF 8 : <sup>280</sup>NCRCPPEWTGQYCTEDVDECQLMPNACQNGG**T**CHNTHGGY<sup>319</sup>

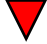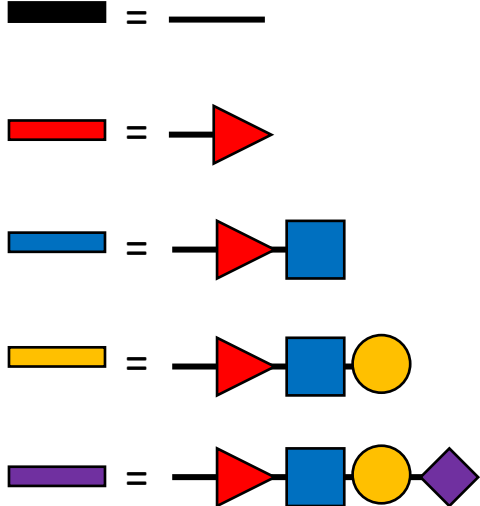

| #1 | b <sup>+</sup> | b <sup>2+</sup> | b <sup>3+</sup> | b <sup>4+</sup> | Seq.         | y <sup>+</sup> | y <sup>2+</sup> | y <sup>3+</sup> | y <sup>4+</sup> | #2 |
|----|----------------|-----------------|-----------------|-----------------|--------------|----------------|-----------------|-----------------|-----------------|----|
| 1  | 115.05020      | 58.02874        | 39.02159        | 29.51801        | N            |                |                 |                 |                 | 40 |
| 2  | 275.08085      | 138.04406       | 92.36514        | 69.52567        | C-Carbami... | 5008.93650     | 2504.97189      | 1670.31702      | 1252.98958      | 39 |
| 3  | 431.18196      | 216.09462       | 144.39884       | 108.55095       | R            | 4848.90585     | 2424.95656      | 1616.97347      | 1212.98192      | 38 |
| 4  | 591.21261      | 296.10994       | 197.74239       | 148.55861       | C-Carbami... | 4692.80474     | 2346.90601      | 1564.93976      | 1173.95664      | 37 |
| 5  | 688.26538      | 344.63633       | 230.09331       | 172.82180       | P            | 4532.77409     | 2266.89068      | 1511.59621      | 1133.94898      | 36 |
| 6  | 785.31814      | 393.16271       | 262.44423       | 197.08499       | P            | 4435.72133     | 2218.36430      | 1479.24529      | 1109.68579      | 35 |
| 7  | 914.36073      | 457.68400       | 305.45843       | 229.34564       | E            | 4338.66856     | 2169.83792      | 1446.89437      | 1085.42260      | 34 |
| 8  | 1100.44005     | 550.72366       | 367.48487       | 275.86547       | W            | 4209.62597     | 2105.31662      | 1403.88017      | 1053.16195      | 33 |
| 9  | 1201.48772     | 601.24750       | 401.16743       | 301.12739       | T            | 4023.54666     | 2012.27697      | 1341.85374      | 1006.64212      | 32 |
| 10 | 1258.50919     | 629.75823       | 420.17458       | 315.38275       | G            | 3922.49898     | 1961.75313      | 1308.17118      | 981.38020       | 31 |
| 11 | 1386.56776     | 693.78752       | 462.86077       | 347.39740       | Q            | 3865.47751     | 1933.24240      | 1289.16402      | 967.12484       | 30 |
| 12 | 1549.63109     | 775.31919       | 517.21522       | 388.16323       | Y            | 3737.41894     | 1869.21311      | 1246.47783      | 935.11019       | 29 |
| 13 | 1709.66174     | 855.33451       | 570.55877       | 428.17089       | C-Carbami... | 3574.35561     | 1787.68144      | 1192.12339      | 894.34436       | 28 |
| 14 | 2159.84670     | 1080.42699      | 720.62042       | 540.71713       | T-HexNAc...  | 3414.32496     | 1707.66612      | 1138.77984      | 854.33670       | 27 |
| 15 | 2288.88929     | 1144.94829      | 763.63462       | 572.97778       | E            | 2964.14000     | 1482.57364      | 988.71818       | 741.79046       | 26 |
| 16 | 2403.91624     | 1202.46176      | 801.97693       | 601.73452       | D            | 2835.09741     | 1418.05234      | 945.70399       | 709.52981       | 25 |
| 17 | 2502.98465     | 1251.99596      | 834.99973       | 626.50162       | V            | 2720.07046     | 1360.53887      | 907.36167       | 680.77307       | 24 |
| 18 | 2618.01159     | 1309.50944      | 873.34205       | 655.25836       | D            | 2621.00205     | 1311.00466      | 874.33887       | 656.00597       | 23 |
| 19 | 2747.05419     | 1374.03073      | 916.35625       | 687.51900       | E            | 2505.97511     | 1253.49119      | 835.99655       | 627.24923       | 22 |
| 20 | 2907.08484     | 1454.04606      | 969.69980       | 727.52667       | C-Carbami... | 2376.93251     | 1188.96990      | 792.98236       | 594.98859       | 21 |
| 21 | 3035.14341     | 1518.07535      | 1012.38599      | 759.54131       | Q            | 2216.90186     | 1108.95457      | 739.63881       | 554.98092       | 20 |
| 22 | 3148.22748     | 1574.61738      | 1050.08068      | 787.81233       | L            | 2088.84329     | 1044.92528      | 696.95261       | 522.96628       | 19 |
| 23 | 3279.26796     | 1640.13762      | 1093.76084      | 820.57245       | M            | 1975.75922     | 988.38325       | 659.25793       | 494.69526       | 18 |
| 24 | 3376.32073     | 1688.66400      | 1126.11176      | 844.83564       | P            | 1844.71874     | 922.86301       | 615.57776       | 461.93514       | 17 |
| 25 | 3490.36365     | 1745.68546      | 1164.12607      | 873.34637       | N            | 1747.66598     | 874.33663       | 583.22684       | 437.67195       | 16 |
| 26 | 3561.40077     | 1781.20402      | 1187.80511      | 891.10565       | A            | 1633.62305     | 817.31516       | 545.21253       | 409.16122       | 15 |
| 27 | 3721.43142     | 1861.21935      | 1241.14866      | 931.11331       | C-Carbami... | 1562.58593     | 781.79661       | 521.53350       | 391.40194       | 14 |
| 28 | 3849.48999     | 1925.24863      | 1283.83485      | 963.12796       | Q            | 1402.55529     | 701.78128       | 468.18995       | 351.39428       | 13 |
| 29 | 3963.53292     | 1982.27010      | 1321.84916      | 991.63869       | N            | 1274.49671     | 637.75199       | 425.50375       | 319.37963       | 12 |
| 30 | 4020.55438     | 2010.78083      | 1340.85631      | 1005.89405      | G            | 1160.45378     | 580.73053       | 387.48944       | 290.86890       | 11 |
| 31 | 4077.57585     | 2039.29156      | 1359.86347      | 1020.14942      | G            | 1103.43232     | 552.21980       | 368.48229       | 276.61354       | 10 |
| 32 | 4178.62353     | 2089.81540      | 1393.54603      | 1045.41134      | T            | 1046.41085     | 523.70907       | 349.47514       | 262.35817       | 9  |
| 33 | 4338.65417     | 2169.83073      | 1446.88958      | 1085.41900      | C-Carbami... | 945.36318      | 473.18523       | 315.79258       | 237.09625       | 8  |
| 34 | 4475.71309     | 2238.36018      | 1492.57588      | 1119.68373      | H            | 785.33253      | 393.16990       | 262.44903       | 197.08859       | 7  |
| 35 | 4589.75601     | 2295.38165      | 1530.59019      | 1148.19446      | N            | 648.27361      | 324.64045       | 216.76272       | 162.82386       | 6  |
| 36 | 4690.80369     | 2345.90548      | 1564.27275      | 1173.45638      | T            | 534.23069      | 267.61898       | 178.74841       | 134.31313       | 5  |
| 37 | 4827.86260     | 2414.43494      | 1609.95905      | 1207.72111      | H            | 433.18301      | 217.09514       | 145.06585       | 109.05121       | 4  |
| 38 | 4884.88407     | 2442.94567      | 1628.96621      | 1221.97647      | G            | 296.12410      | 148.56569       | 99.37955        | 74.78648        | 3  |
| 39 | 4941.90553     | 2471.45640      | 1647.97336      | 1236.23184      | G            | 239.10263      | 120.05496       | 80.37240        | 60.53112        | 2  |
| 40 |                |                 |                 |                 | Y            | 182.08117      | 91.54422        | 61.36524        | 46.27575        | 1  |

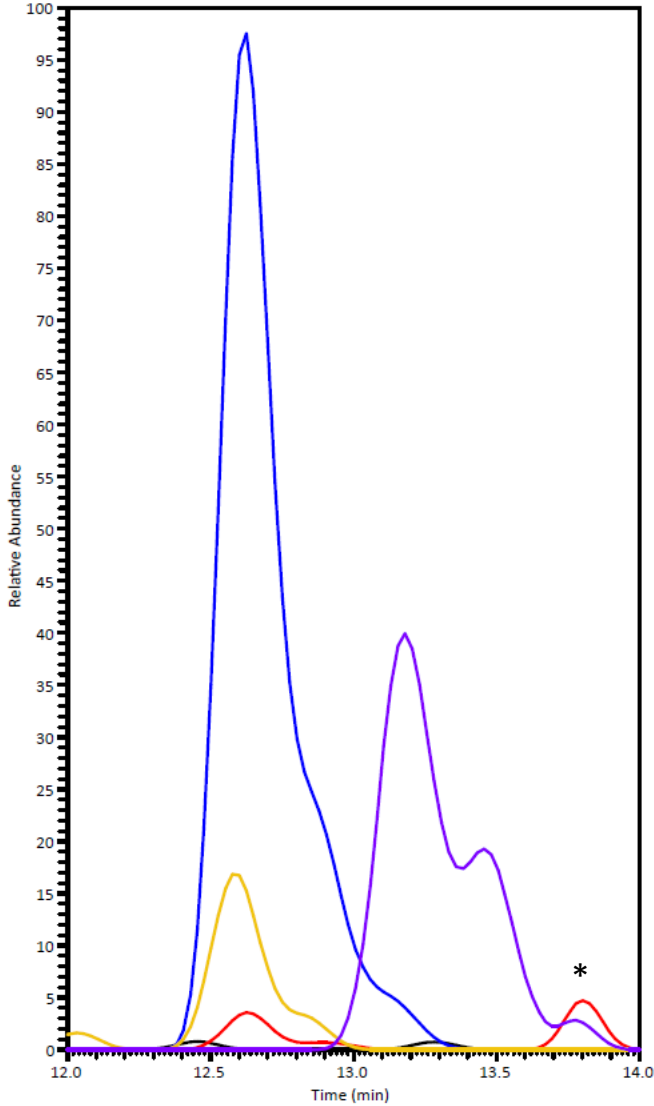

FP040621\_17.raw #5016 RT: 12.5926 min  
FTMS, 1282.2562@hcd27.00, z=+4, Mono m/z=1281.51367 Da, MH+=5123.03286 Da, Match Tol.=20 ppm

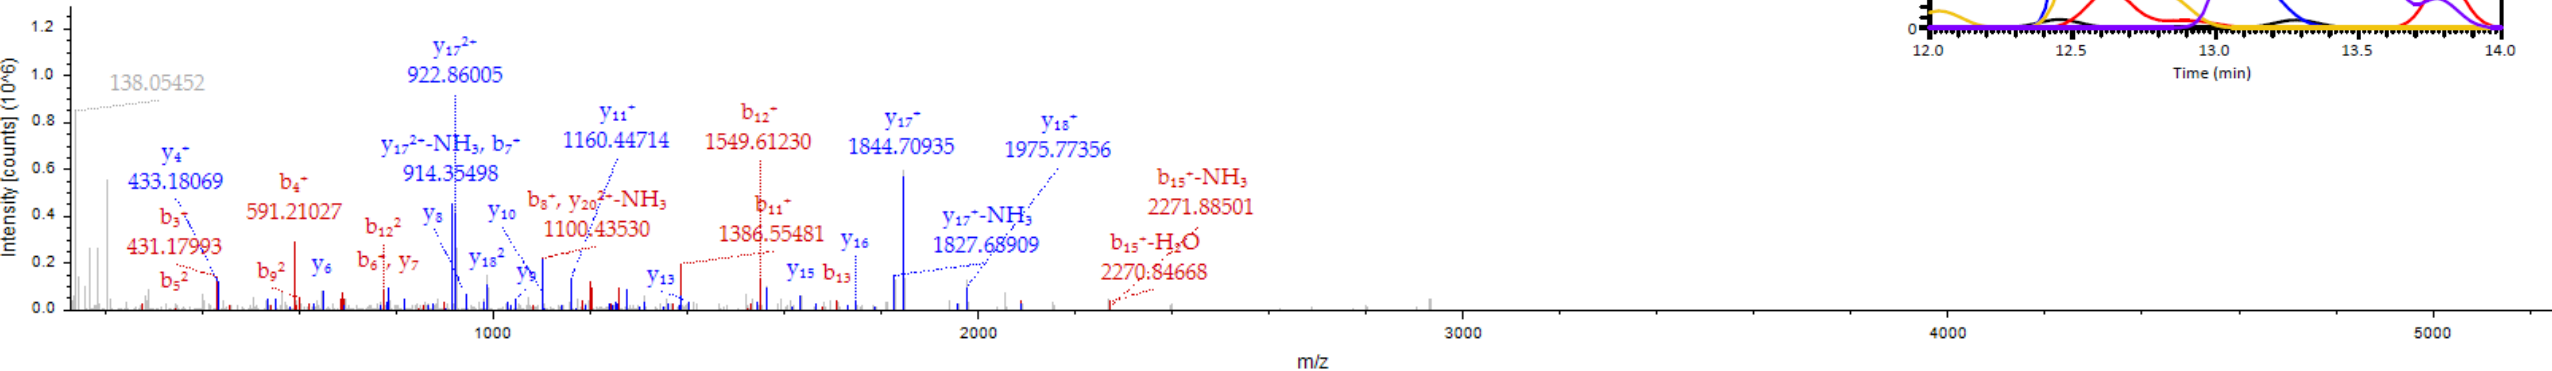



Figure S7F

EGF 9 : <sup>346</sup>QGATCHDRVASFY<sup>358</sup>

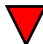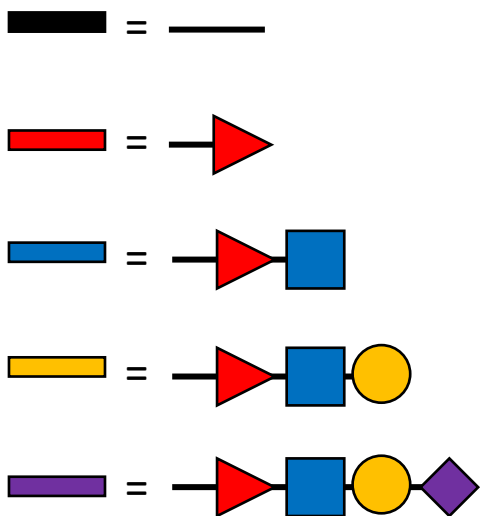

| #1 | b <sup>+</sup> | b <sup>2+</sup> | Seq.         | y <sup>+</sup> | y <sup>2+</sup> | #2 |
|----|----------------|-----------------|--------------|----------------|-----------------|----|
| 1  | 129.06585      | 65.03657        | Q            |                |                 | 13 |
| 2  | 186.08732      | 93.54730        | G            | 1529.66892     | 765.33810       | 12 |
| 3  | 257.12443      | 129.06585       | A            | 1472.64745     | 736.82737       | 11 |
| 4  | 358.17211      | 179.58969       | T            | 1401.61034     | 701.30881       | 10 |
| 5  | 518.20276      | 259.60502       | C-Carbami... | 1300.56266     | 650.78497       | 9  |
| 6  | 655.26167      | 328.13447       | H            | 1140.53201     | 570.76965       | 8  |
| 7  | 770.28861      | 385.64794       | D            | 1003.47310     | 502.24019       | 7  |
| 8  | 926.38972      | 463.69850       | R            | 888.44616      | 444.72672       | 6  |
| 9  | 1025.45814     | 513.23271       | V            | 732.34505      | 366.67616       | 5  |
| 10 | 1096.49525     | 548.75126       | A            | 633.27663      | 317.14196       | 4  |
| 11 | 1329.58519     | 665.29623       | S-Fuc(1)     | 562.23952      | 281.62340       | 3  |
| 12 | 1476.65360     | 738.83044       | F            | 329.14958      | 165.07843       | 2  |
| 13 |                |                 | Y            | 182.08117      | 91.54422        | 1  |

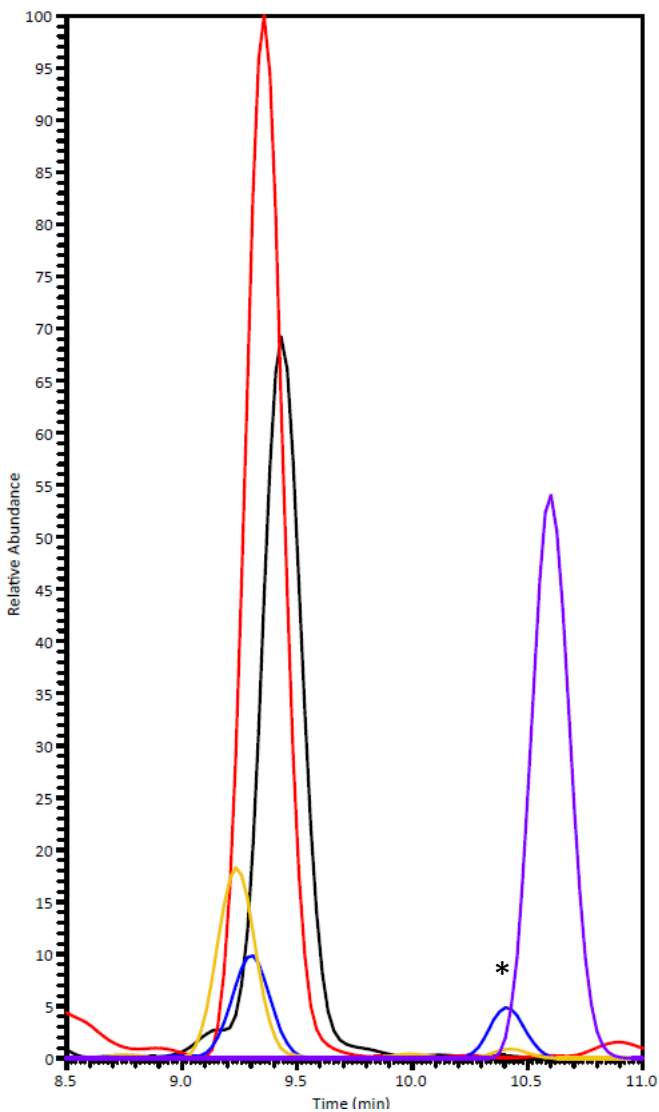

FP040621\_17.raw #3584 RT: 9.3448 min  
FTMS, 829.3718@hcd27.00, z=+2, Mono m/z=829.37177 Da, MH+=1657.73625 Da, Match Tol.=20 ppm

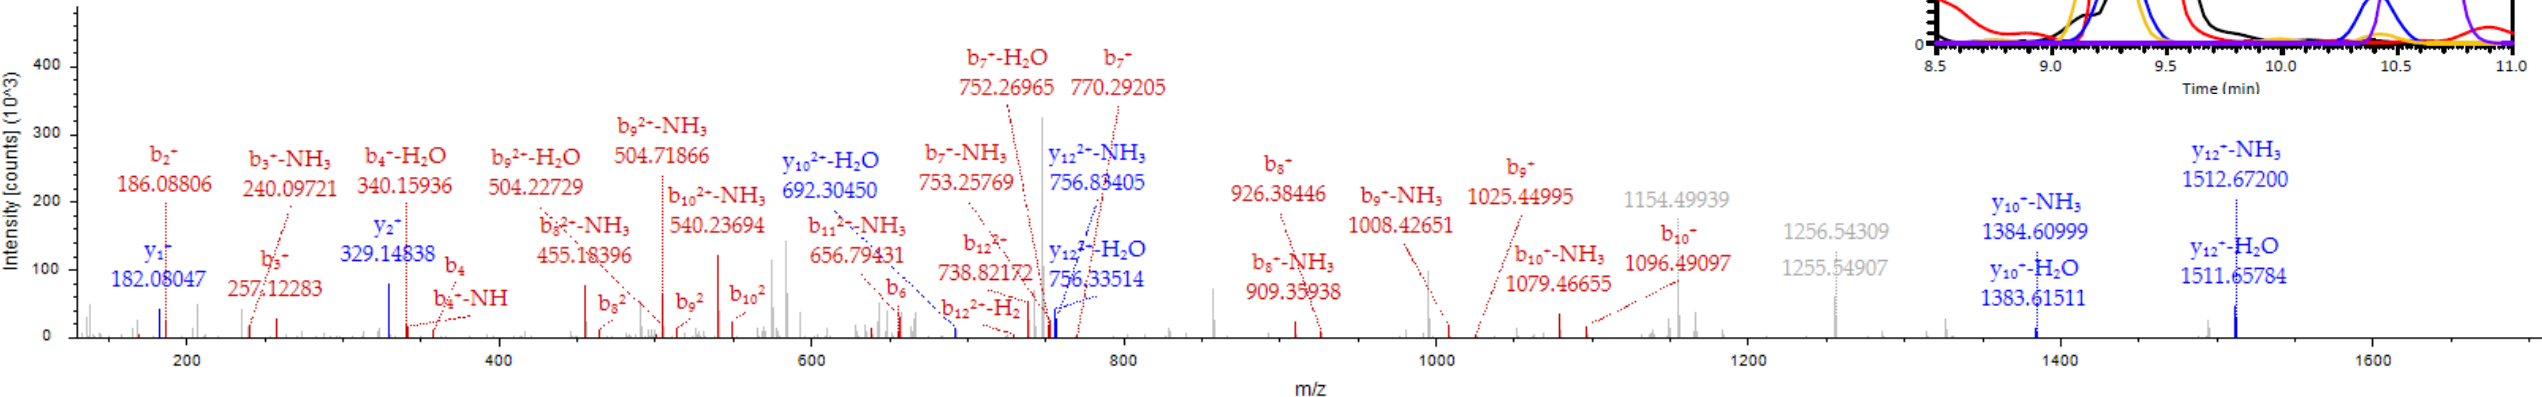

Figure S7G

EGF 12 : <sup>451</sup>IDVNECISNPCQNDATCLDQIGE<sup>473</sup>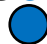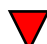

=

=

=

=

=

| #1 | b <sup>+</sup> | b <sup>2+</sup> | b <sup>3+</sup> | Seq.         | y <sup>+</sup> | y <sup>2+</sup> | y <sup>3+</sup> | #2 |
|----|----------------|-----------------|-----------------|--------------|----------------|-----------------|-----------------|----|
| 1  | 114.09134      | 57.54931        | 38.70196        | I            |                |                 |                 | 23 |
| 2  | 229.11828      | 115.06278       | 77.04428        | D            | 3124.22864     | 1562.61796      | 1042.08107      | 22 |
| 3  | 328.18670      | 164.59699       | 110.06708       | V            | 3009.20170     | 1505.10449      | 1003.73875      | 21 |
| 4  | 442.22962      | 221.61845       | 148.08139       | N            | 2910.13329     | 1455.57028      | 970.71595       | 20 |
| 5  | 571.27222      | 286.13975       | 191.09559       | E            | 2796.09036     | 1398.54882      | 932.70164       | 19 |
| 6  | 731.30287      | 366.15507       | 244.43914       | C-Carbami... | 2667.04776     | 1334.02752      | 889.68744       | 18 |
| 7  | 844.38693      | 422.69710       | 282.13383       | I            | 2507.01712     | 1254.01220      | 836.34389       | 17 |
| 8  | 1357.55630     | 679.28179       | 453.19028       | S-Hex(1)P... | 2393.93305     | 1197.47016      | 798.64920       | 16 |
| 9  | 1471.59923     | 736.30325       | 491.20459       | N            | 1880.76368     | 940.88548       | 627.59275       | 15 |
| 10 | 1568.65199     | 784.82963       | 523.55551       | P            | 1766.72076     | 883.86402       | 589.57844       | 14 |
| 11 | 1728.68264     | 864.84496       | 576.89906       | C-Carbami... | 1669.66799     | 835.33763       | 557.22752       | 13 |
| 12 | 1856.74122     | 928.87425       | 619.58526       | Q            | 1509.63734     | 755.32231       | 503.88397       | 12 |
| 13 | 1970.78414     | 985.89571       | 657.59957       | N            | 1381.57877     | 691.29302       | 461.19777       | 11 |
| 14 | 2085.81109     | 1043.40918      | 695.94188       | D            | 1267.53584     | 634.27156       | 423.18346       | 10 |
| 15 | 2156.84820     | 1078.92774      | 719.62092       | A            | 1152.50890     | 576.75809       | 384.84115       | 9  |
| 16 | 2403.95379     | 1202.48053      | 801.98945       | T-Fuc(1)     | 1081.47178     | 541.23953       | 361.16211       | 8  |
| 17 | 2563.98444     | 1282.49586      | 855.33300       | C-Carbami... | 834.36619      | 417.68674       | 278.79358       | 7  |
| 18 | 2677.06850     | 1339.03789      | 893.02768       | L            | 674.33555      | 337.67141       | 225.45003       | 6  |
| 19 | 2792.09544     | 1396.55136      | 931.37000       | D            | 561.25148      | 281.12938       | 187.75535       | 5  |
| 20 | 2920.15402     | 1460.58065      | 974.05619       | Q            | 446.22454      | 223.61591       | 149.41303       | 4  |
| 21 | 3033.23808     | 1517.12268      | 1011.75088      | I            | 318.16596      | 159.58662       | 106.72684       | 3  |
| 22 | 3090.25955     | 1545.63341      | 1030.75803      | G            | 205.08190      | 103.04459       | 69.03215        | 2  |
| 23 |                |                 |                 | E            | 148.06043      | 74.53386        | 50.02500        | 1  |

FP040621\_14.raw #5781 RT: 14.6023 min  
 FTMS, 1080.1116@hcd27.00, z=+3, Mono m/z=1079.77917 Da, MH+=3237.32297 Da, Match Tol.=20 ppm

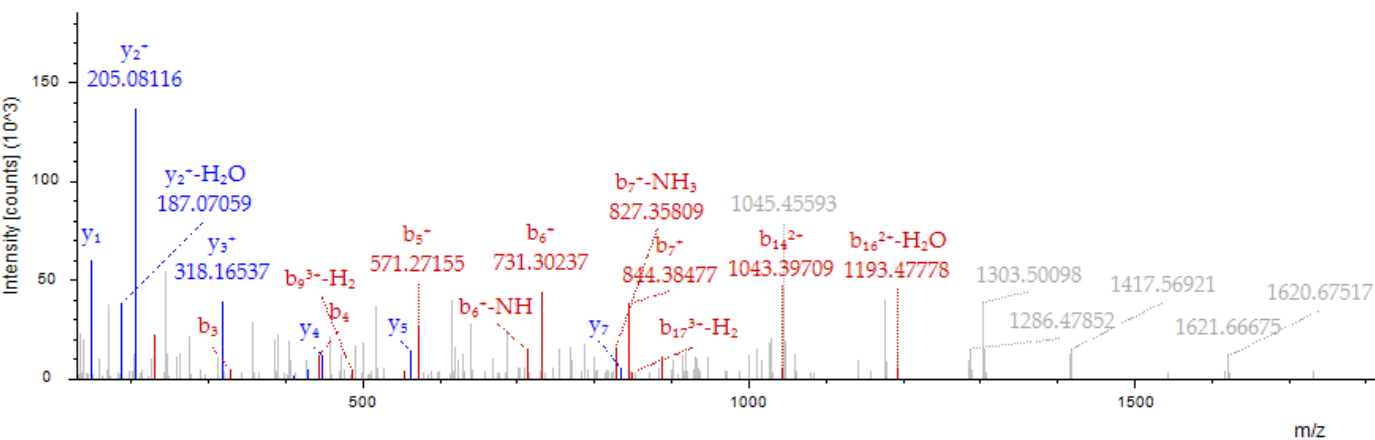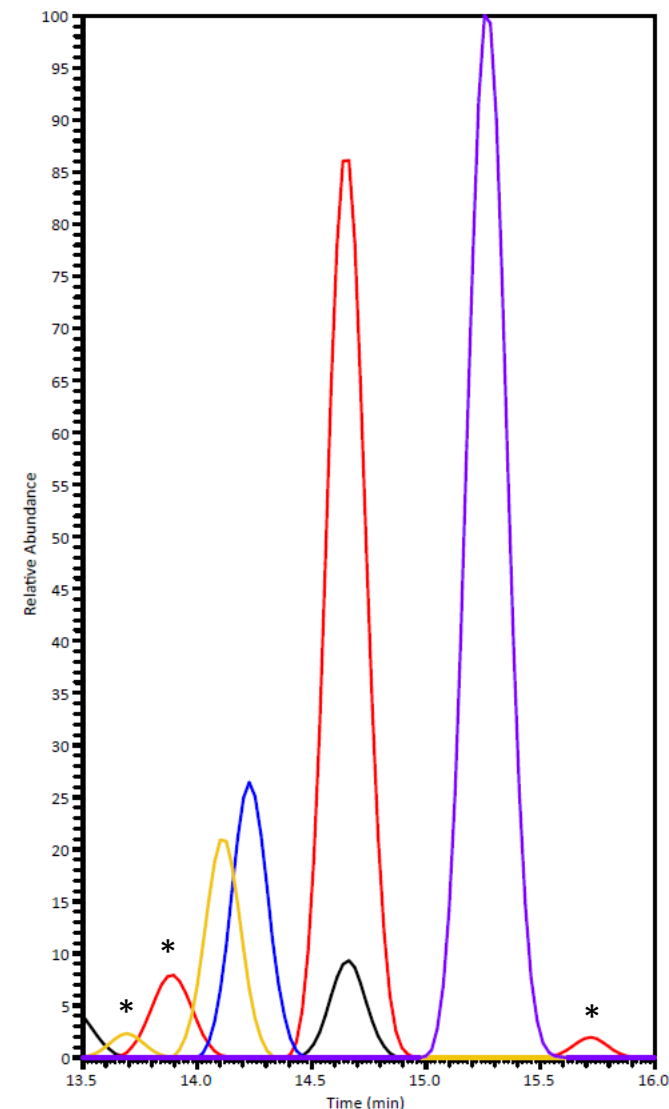

Figure S7H

EGF 16 : <sup>614</sup>HGGT**C**QDRDNSYLCLCLK<sup>631</sup>

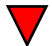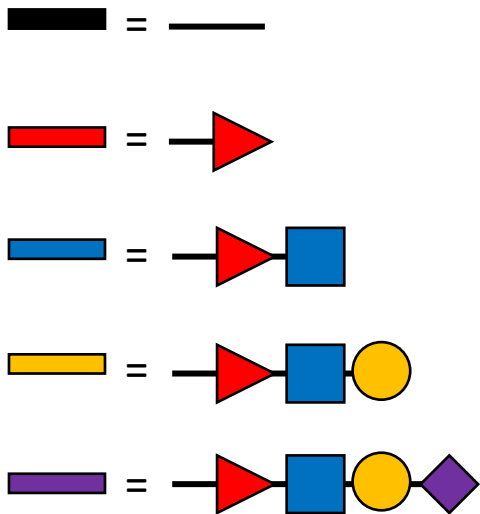

| #1 | b <sup>+</sup> | b <sup>2+</sup> | b <sup>3+</sup> | b <sup>4+</sup> | Seq.         | y <sup>+</sup> | y <sup>2+</sup> | y <sup>3+</sup> | y <sup>4+</sup> | #2 |
|----|----------------|-----------------|-----------------|-----------------|--------------|----------------|-----------------|-----------------|-----------------|----|
| 1  | 138.06619      | 69.53673        | 46.69358        | 35.27200        | H            |                |                 |                 |                 | 18 |
| 2  | 195.08765      | 98.04746        | 65.70074        | 49.52737        | G            | 2862.18493     | 1431.59610      | 954.73316       | 716.30169       | 17 |
| 3  | 252.10912      | 126.55820       | 84.70789        | 63.78274        | G            | 2805.16346     | 1403.08537      | 935.72601       | 702.04632       | 16 |
| 4  | 1155.44232     | 578.22480       | 385.81896       | 289.61604       | T-HexNAc...  | 2748.14200     | 1374.57464      | 916.71885       | 687.79096       | 15 |
| 5  | 1315.47296     | 658.24012       | 439.16251       | 329.62370       | C-Carbami... | 1844.80880     | 922.90804       | 615.60778       | 461.95766       | 14 |
| 6  | 1443.53154     | 722.26941       | 481.84870       | 361.63834       | Q            | 1684.77815     | 842.89271       | 562.26423       | 421.95000       | 13 |
| 7  | 1558.55848     | 779.78288       | 520.19101       | 390.39508       | D            | 1556.71957     | 778.86343       | 519.57804       | 389.93535       | 12 |
| 8  | 1714.65960     | 857.83344       | 572.22472       | 429.42036       | R            | 1441.69263     | 721.34995       | 481.23573       | 361.17862       | 11 |
| 9  | 1829.68654     | 915.34691       | 610.56703       | 458.17709       | D            | 1285.59152     | 643.29940       | 429.20202       | 322.15334       | 10 |
| 10 | 1943.72947     | 972.36837       | 648.58134       | 486.68782       | N            | 1170.56458     | 585.78593       | 390.85971       | 293.39660       | 9  |
| 11 | 2030.76149     | 1015.88439      | 677.59202       | 508.44583       | S            | 1056.52165     | 528.76446       | 352.84540       | 264.88587       | 8  |
| 12 | 2193.82482     | 1097.41605      | 731.94646       | 549.21166       | Y            | 969.48962      | 485.24845       | 323.83472       | 243.12786       | 7  |
| 13 | 2306.90889     | 1153.95808      | 769.64115       | 577.48268       | L            | 806.42629      | 403.71678       | 269.48028       | 202.36203       | 6  |
| 14 | 2466.93954     | 1233.97341      | 822.98470       | 617.49034       | C-Carbami... | 693.34223      | 347.17475       | 231.78559       | 174.09101       | 5  |
| 15 | 2580.02360     | 1290.51544      | 860.67938       | 645.76136       | L            | 533.31158      | 267.15943       | 178.44204       | 134.08335       | 4  |
| 16 | 2740.05425     | 1370.53076      | 914.02293       | 685.76902       | C-Carbami... | 420.22752      | 210.61740       | 140.74736       | 105.81234       | 3  |
| 17 | 2853.13831     | 1427.07279      | 951.71762       | 714.04004       | L            | 260.19687      | 130.60207       | 87.40381        | 65.80467        | 2  |
| 18 |                |                 |                 |                 | K            | 147.11280      | 74.06004        | 49.70912        | 37.53366        | 1  |

FP040621\_11.raw #4551 RT: 12.0834 min  
FTMS, 751.0662@hcd27.00, z=+4, Mono m/z=750.56812 Da, MH+=2999.25063 Da, Match Tol.=20 ppm

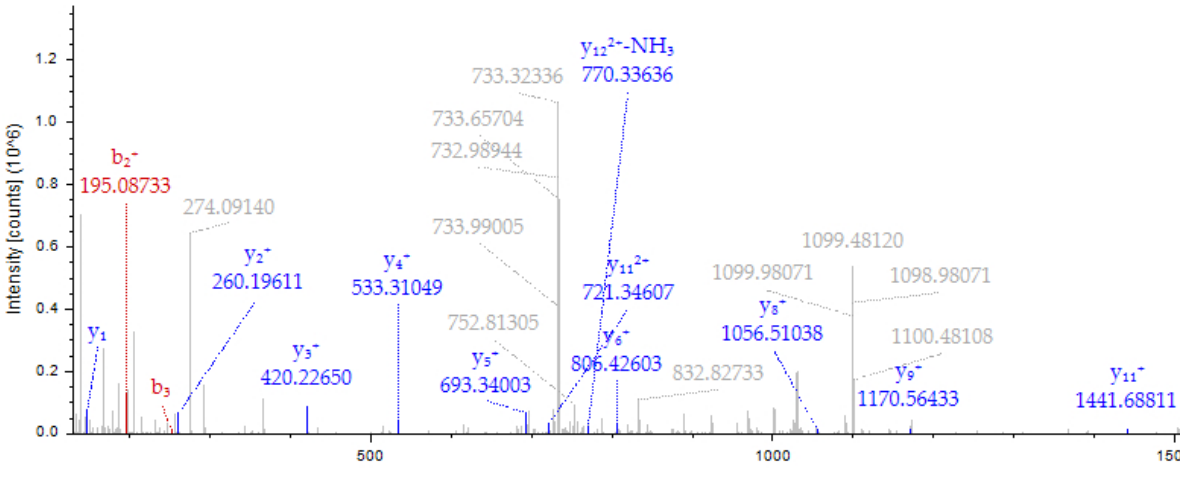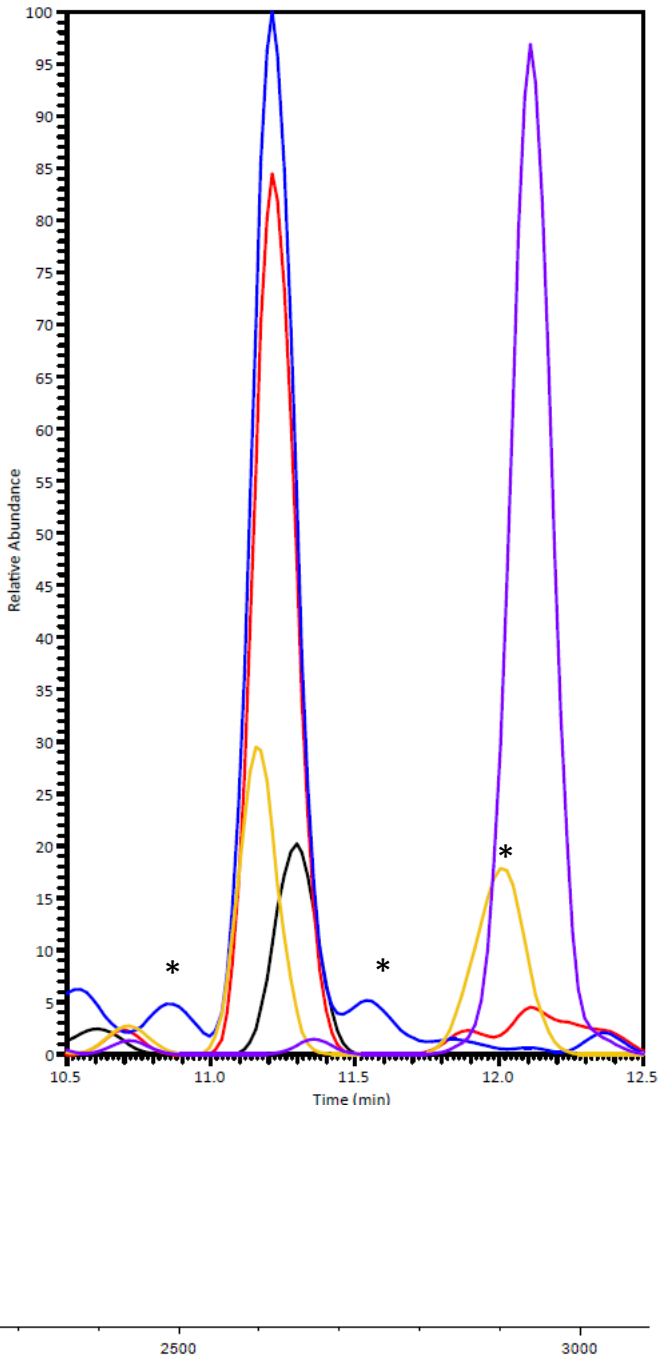

Figure S7I

EGF 18 : <sup>682</sup>CAGSPCHNGG**T**CEDGIAGFTCRCPE<sup>706</sup>

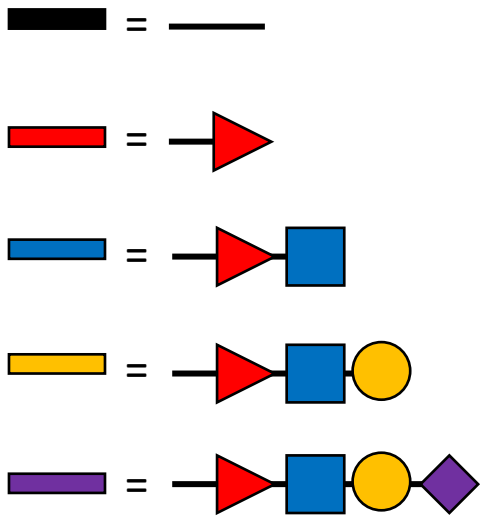

| #1 | b <sup>+</sup> | b <sup>2+</sup> | b <sup>3+</sup> | Seq.         | y <sup>+</sup> | y <sup>2+</sup> | y <sup>3+</sup> | #2 |
|----|----------------|-----------------|-----------------|--------------|----------------|-----------------|-----------------|----|
| 1  | 161.03793      | 81.02260        | 54.35083        | C-Carbami... |                |                 |                 | 25 |
| 2  | 232.07504      | 116.54116       | 78.02986        | A            | 2975.15465     | 1488.08096      | 992.38973       | 24 |
| 3  | 289.09650      | 145.05189       | 97.03702        | G            | 2904.11753     | 1452.56241      | 968.71070       | 23 |
| 4  | 376.12853      | 188.56790       | 126.04769       | S            | 2847.09607     | 1424.05167      | 949.70354       | 22 |
| 5  | 473.18129      | 237.09429       | 158.39862       | P            | 2760.06404     | 1380.53566      | 920.69286       | 21 |
| 6  | 633.21194      | 317.10961       | 211.74217       | C-Carbami... | 2663.01128     | 1332.00928      | 888.34194       | 20 |
| 7  | 770.27085      | 385.63907       | 257.42847       | H            | 2502.98063     | 1251.99395      | 834.99839       | 19 |
| 8  | 884.31378      | 442.66053       | 295.44278       | N            | 2365.92172     | 1183.46450      | 789.31209       | 18 |
| 9  | 941.33525      | 471.17126       | 314.44993       | G            | 2251.87879     | 1126.44303      | 751.29778       | 17 |
| 10 | 998.35671      | 499.68199       | 333.45709       | G            | 2194.85733     | 1097.93230      | 732.29063       | 16 |
| 11 | 1448.54167     | 724.77447       | 483.51874       | T-HexNAc(... | 2137.83586     | 1069.42157      | 713.28347       | 15 |
| 12 | 1608.57232     | 804.78980       | 536.86229       | C-Carbami... | 1687.65090     | 844.32909       | 563.22182       | 14 |
| 13 | 1737.61491     | 869.31109       | 579.87649       | E            | 1527.62025     | 764.31377       | 509.87827       | 13 |
| 14 | 1868.63677     | 934.82202       | 623.55044       | D-Oxidation  | 1398.57766     | 699.79247       | 466.86407       | 12 |
| 15 | 1925.65823     | 963.33275       | 642.55760       | G            | 1267.55580     | 634.28154       | 423.19012       | 11 |
| 16 | 2038.74230     | 1019.87479      | 680.25228       | I            | 1210.53434     | 605.77081       | 404.18296       | 10 |
| 17 | 2109.77941     | 1055.39334      | 703.93132       | A            | 1097.45028     | 549.22878       | 366.48828       | 9  |
| 18 | 2166.80087     | 1083.90408      | 722.93848       | G            | 1026.41316     | 513.71022       | 342.80924       | 8  |
| 19 | 2313.86929     | 1157.43828      | 771.96128       | F            | 969.39170      | 485.19949       | 323.80208       | 7  |
| 20 | 2414.91697     | 1207.96212      | 805.64384       | T            | 822.32328      | 411.66528       | 274.77928       | 6  |
| 21 | 2574.94761     | 1287.97745      | 858.98739       | C-Carbami... | 721.27561      | 361.14144       | 241.09672       | 5  |
| 22 | 2731.04873     | 1366.02800      | 911.02109       | R            | 561.24496      | 281.12612       | 187.75317       | 4  |
| 23 | 2891.07937     | 1446.04333      | 964.36464       | C-Carbami... | 405.14385      | 203.07556       | 135.71947       | 3  |
| 24 | 2988.13214     | 1494.56971      | 996.71556       | P            | 245.11320      | 123.06024       | 82.37592        | 2  |
| 25 |                |                 |                 | E            | 148.06043      | 74.53386        | 50.02500        | 1  |

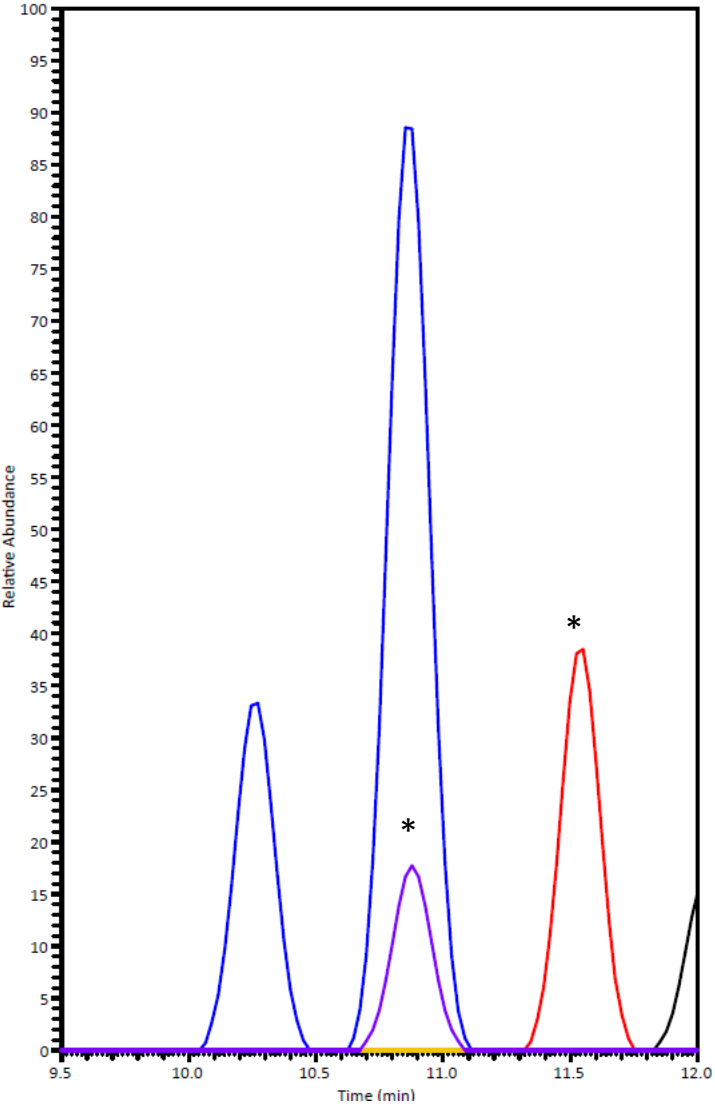

FP040621\_14.raw #4185 RT: 10.8925 min  
FTMS, 1046.0757@hcd27.00, z=+3, Mono m/z=1045.74023 Da, MH+=3135.20615 Da, Match Tol.=20 ppm

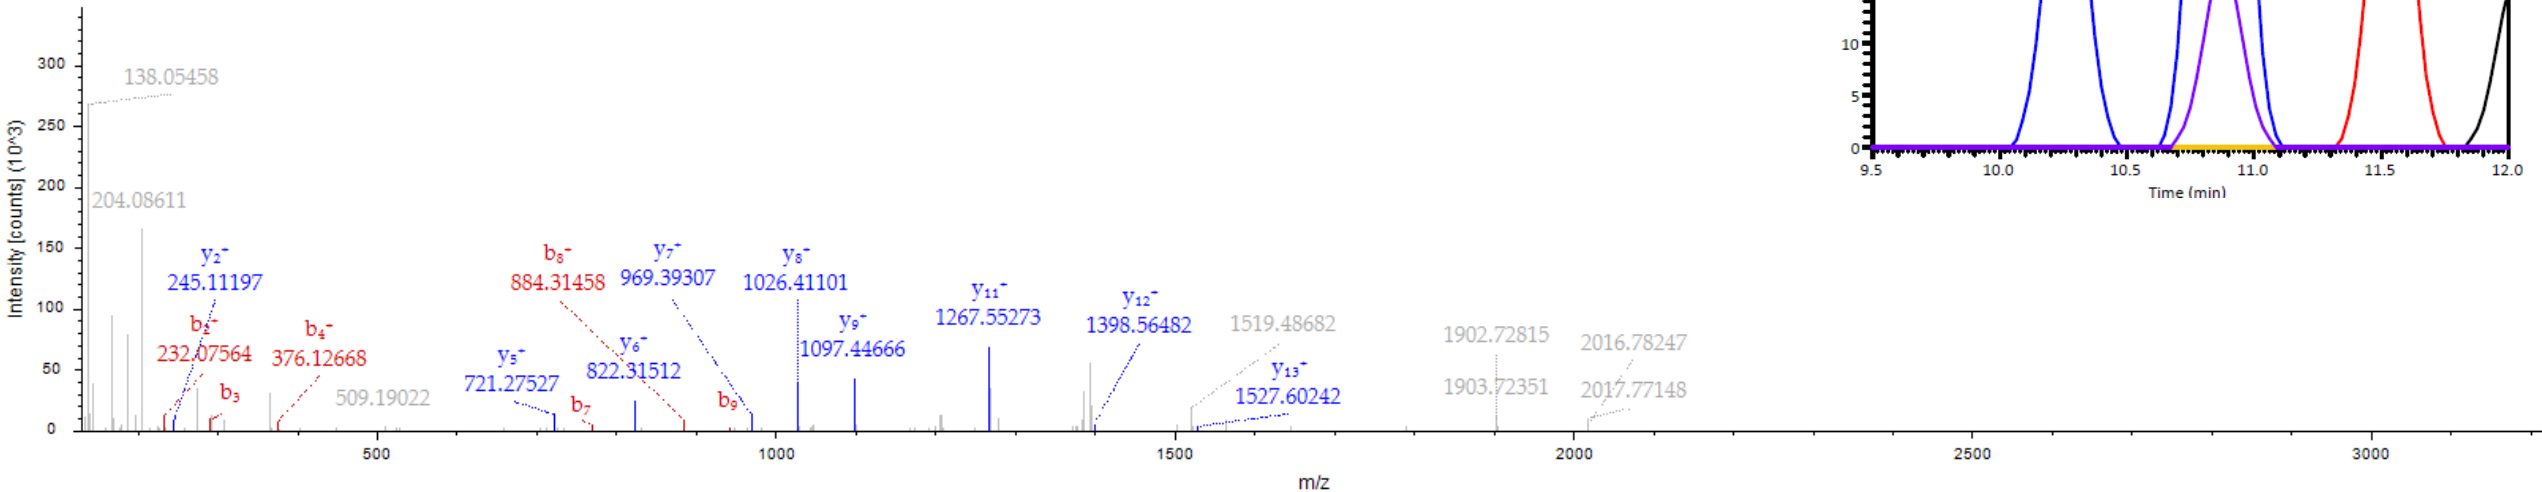

**Figure S7. MS/MS spectra for *O*-fucosylated peptides from EGF1-18.** N1 was expressed in CHO, U2OS or 3T3 cells with different combination of Fringe, purified from medium, reduced/alkylated, digested with proteases, and the resulting peptides were analyzed by nano-LC-MS/MS as described in Experimental Procedures. Glycopeptides were identified using PMI-Byonic (v.2.10.5) and Proteome Discoverer (v2.1). Spectra for the most representative glycoform of peptides of all conditions from different EGFs are shown, and Extracted Ion Chromatograms (EICs) for each glycoform were generated using Xcalibur Qual Browser (v2.0.3). Peptides are shown from EGF2 (A), EGF3 (B), EGF5 (C), EGF6 (D), EGF8 (E), EGF9 (F), EGF12 (G), EGF16 (H) and EGF18 (I). Since the position of the glycans given by PMI-Byonic and Proteome Discoverer can be erroneous (EGF2, 8 and 9), their position in a monosaccharide form was added to the sequence of each EGFs. The red triangle symbolizes the position of *O*-fucoses and the blue circle the position of *O*-glucoses. Asterisks denote ions that have a similar mass but MS/MS fragmentation does not match the indicated peptide. Data can be found in Supporting Information Tables S4 to S53.
